# Supplementary material
Source: PubMed Central journal article supplement (PMC10805613)
Supplement: ehp13182.s001.acco.pdf [file ehp13182.s001.acco.pdf]

**Note to readers with disabilities:** *EHP* strives to ensure that all journal content is accessible to all readers. However, some figures and Supplemental Material published in *EHP* articles may not conform to [508 standards](#) due to the complexity of the information being presented. If you need assistance accessing journal content, please contact [ehp508@niehs.nih.gov](mailto:ehp508@niehs.nih.gov). Our staff will work with you to assess and meet your accessibility needs within 3 working days.

### **Supplemental Material**

#### **Associations of Organophosphate Ester Flame Retardant Exposures during Pregnancy with Gestational Duration and Fetal Growth: The Environmental influences on Child Health Outcomes (ECHO) Program**

Jiwon Oh, Jessie P. Buckley, Xuan Li, Kennedy K. Gachigi, Kurunthachalam Kannan, Wenjie Lyu, Jennifer L. Ames, Emily S. Barrett, Theresa M. Bastain, Carrie V. Breton, Claudia Buss, Lisa A. Croen, Anne L. Dunlop, Assiamira Ferrara, Akhgar Ghassabian, Julie B. Herbstman, Ixel Hernandez-Castro, Irva Hertz-Picciotto, Linda G. Kahn, Margaret R. Karagas, Jordan R. Kuiper, Cindy T. McEvoy, John D. Meeker, Rachel Morello-Frosch, Amy M. Padula, Megan E. Romano, Sheela Sathyanarayana, Susan Schantz, Rebecca J. Schmidt, Hyagriv Simhan, Anne P. Starling, Frances A. Tylavsky, Heather E. Volk, Tracey J. Woodruff, Yeyi Zhu, Deborah H. Bennett, and program collaborators for Environmental influences on Child Health Outcomes

#### **Table of Contents**

**Table S1.** Information on 16 ECHO cohorts contributing to this study.

**Table S2.** Information on nine OPE biomarkers quantified in prenatal maternal serum samples in the ECHO cohorts.

**Table S3.** Demographic characteristics of participants from 16 ECHO cohorts by study sample inclusion status.

**Table S4.** Distributions of urinary dilution-standardized OPE biomarker concentrations by ECHO cohort.

**Table S5.** Spearman's correlation coefficients among urinary dilution-standardized OPE biomarker concentrations among 6646 ECHO pregnant participants.

**Table S6.** Analysis results of urinary OPE biomarker concentrations in 191 blinded duplicate samples.

**Table S7.** Sex-stratified associations between prenatal maternal urinary OPE biomarkers and gestational duration in the ECHO cohorts and *p*-value for the interaction term between child's sex and OPE biomarkers to test for effect measure modification.

**Table S8.** Sex-stratified associations between prenatal maternal urinary OPE biomarkers and fetal growth in the ECHO cohorts and *p*-value for the interaction term between child's sex and OPE biomarkers to test for effect measure modification.

**Table S9.** Associations between prenatal maternal urinary OPE biomarkers and gestational duration in the ECHO cohorts when jointly modelling all OPE biomarkers in the same regression model.

**Table S10.** Associations between prenatal maternal urinary OPE biomarkers and fetal growth in the ECHO cohorts when jointly modelling all OPE biomarkers in the same regression model.

**Table S11.** Median concentrations of prenatal maternal urinary OPE biomarkers across birth cohort studies.

**Figure S1.** Geographic locations of 16 cohorts contributing to the ECHO study on organophosphate ester flame retardant exposures during pregnancy and gestational duration and fetal growth.

**Figure S2.** Flowchart depicting inclusion/exclusion criteria.

**Figure S3.** Directed acyclic graph for the relation between maternal OPE exposures during pregnancy and birth outcomes.

**Figure S4.** Graphical representation of distributions of dilution-standardized urinary OPE biomarker concentrations by ECHO cohort.

**Figure S5.** Graphical representation of leave-one-out analysis results for preterm birth (vs. full-term) in the ECHO cohorts.

**Figure S6.** Graphical representation of leave-one-out analysis results for gestational age (weeks) in the ECHO cohorts.

**Figure S7.** Graphical representation of leave-one-out analysis results for birth weight-for-gestational-age z-score in the ECHO cohorts.

## References

**Additional File-** Excel Document

**Table S1.** Information on 16 ECHO cohorts contributing to this study.

| Cohort name                                                                              | # of samples included [% out of 6646] / # of samples not included [% out of 5825] <sup>a</sup> (sample selection criteria)  | Sample description                                                                                                                                                                                                                                       | Eligibility criteria                                                                                                                                                                                                                                                                                           | Primary method for obtaining birth outcomes                                                                                        |
|------------------------------------------------------------------------------------------|-----------------------------------------------------------------------------------------------------------------------------|----------------------------------------------------------------------------------------------------------------------------------------------------------------------------------------------------------------------------------------------------------|----------------------------------------------------------------------------------------------------------------------------------------------------------------------------------------------------------------------------------------------------------------------------------------------------------------|------------------------------------------------------------------------------------------------------------------------------------|
| Atlanta ECHO Cohort of EMORY University                                                  | 20 [0.3%] / 477 [8.2%]<br>(participants selected at random)                                                                 | African American women recruited from two prenatal clinics in Atlanta, GA and their offspring.                                                                                                                                                           | Eligible women were self-reported Black/African American race/ethnicity, had singleton pregnancies, self-reported that they were born in the United States, had English fluency, were aged 18–40 years old, and did not have IVF or pre-existing chronic medical conditions.                                   | GA – calculated based on the EDD determined by the 1 <sup>st</sup> or 2 <sup>nd</sup> trimester ultrasound<br>BW – medical records |
| Conditions Affecting Neurocognitive Development and Learning in Early Childhood (CANDLE) | 1453 [21.9%] / 25 [0.4%]<br>(all participants with an available urine sample)                                               | A majority African American sample of mother-child dyads recruited in pregnancy in Memphis, TN from safety net obstetrical clinics and local OB/GYN partners, television and radio advertisements, and directed mailings.                                | Eligibility criteria included planning to deliver at one of five hospitals in Memphis, aged between 16-40 years, residence in Shelby County, TN, and having a low medical risk pregnancy. Eligible women had English fluency, had a singleton pregnancy, and were between 16-28 weeks gestation at enrollment. | GA & BW – medical records                                                                                                          |
| Chemicals in our Bodies (CIOB)                                                           | 394 [5.9%] / 411 [7.1%]<br>(all participants who consented to ECHO and had sufficient urine volume at the time of shipment) | Pregnant women recruited from 2 hospitals in San Francisco, CA and their offspring.                                                                                                                                                                      | Eligible mothers were fluent in English or Spanish, had singleton births, were ≥18 years of age, and had no major pregnancy complications.                                                                                                                                                                     | GA & BW – medical records                                                                                                          |
| Early Autism Risk Longitudinal Investigation (EARLI)                                     | 91 [1.4%] / 28 [0.5%]<br>(participants who had signed an ECHO consent were included) <sup>b</sup>                           | Pregnant women with a biological child with autism spectrum disorder (ASD) and the offspring of the current pregnancy, recruited from local community events, autism conferences, direct mail via autism service providers, and online and social media. | Eligible women had a biological child who had been diagnosed with an ASD, were competent to communicate in English (or, at two sites, in Spanish), were 18 years of age or older, lived within two hours of a study clinic, and were no more than 28 weeks pregnant.                                           | GA & BW – medical records                                                                                                          |

| <b>Cohort name</b>                                                                | <b># of samples included [% out of 6646] / # of samples not included [% out of 5825]<sup>a</sup> (sample selection criteria)</b>                           | <b>Sample description</b>                                                                                                                                                                 | <b>Eligibility criteria</b>                                                                                                                                                                                                                                                                                                       | <b>Primary method for obtaining birth outcomes</b>                                                                                                                         |
|-----------------------------------------------------------------------------------|------------------------------------------------------------------------------------------------------------------------------------------------------------|-------------------------------------------------------------------------------------------------------------------------------------------------------------------------------------------|-----------------------------------------------------------------------------------------------------------------------------------------------------------------------------------------------------------------------------------------------------------------------------------------------------------------------------------|----------------------------------------------------------------------------------------------------------------------------------------------------------------------------|
| Fair Start                                                                        | 206 [3.1%] / 145 [2.5%]<br>(all participants with sufficient urine volume)                                                                                 | Dominican or African American low-income mothers and their offspring recruited at OB/GYN clinics in New York, NY.                                                                         | Eligible mothers were fluent in English or Spanish, had singleton pregnancies, and were $\geq 18$ years of age.                                                                                                                                                                                                                   | GA & BW – medical records                                                                                                                                                  |
| Healthy Start                                                                     | 550 [8.3%] / 829 [14.2%]<br>(all participants with sufficient remaining volume of stored urine from pregnancy)                                             | Pregnant women recruited from obstetrics clinics at a university hospital in the Denver, Colorado metropolitan area and their offspring.                                                  | Eligible women were $\geq 16$ years old, had singleton pregnancies, and had no history of previous stillbirth or extremely preterm birth, and no self-reported history of diabetes, cancer, asthma treated with steroids, or psychiatric conditions.                                                                              | GA & BW – medical records                                                                                                                                                  |
| Illinois Kids Development Study (IKIDS)                                           | 283 [4.3%] / 221 [3.8%]<br>(sufficient urine available and the women remained in the study until at least the birth of her child with some data collected) | Pregnant women recruited from 2 OB/GYN clinics in central Illinois and their offspring.                                                                                                   | Eligible mothers were 18–40 years old, had singleton pregnancies, were not in a high-risk pregnancy, were fluent in English, and were not planning to leave the area before the child's first birthday.                                                                                                                           | GA – calculated based on the EDD determined by an ultrasound at 16-18 weeks<br>BW – recorded from the crib card during the hospital visit                                  |
| Maternal and Developmental Risks from Environmental and Social Stressors (MADRES) | 425 [6.4%] / 310 [5.3%]<br>(all participants with an available urine specimens at the 3 <sup>rd</sup> trimester)                                           | Pregnant women recruited from 4 OB/GYN clinics serving low income populations in Los Angeles, CA and their offspring.                                                                     | Eligible mothers were $\geq 18$ years old, had singleton pregnancies, were fluent speakers of English or Spanish, were not incarcerated, were not HIV positive, and had no physical, mental or cognitive disability that would prevent participation or informed consent.                                                         | GA – >95% of participants had EDD abstracted (and GA at birth calculated) from medical records from ultrasound measurements or physician estimates<br>BW – medical records |
| Magee                                                                             | 75 [1.1%] / 254 [4.4%]<br>(all participants with a sufficient urine volume)                                                                                | Women recruited during the first trimester of pregnancy from clinics in Pittsburgh, PA serving high psychosocial risk populations, oversampled for childhood trauma, and their offspring. | Eligibility criteria for mothers at enrollment: Inclusion criteria were a) $\geq 18$ years age, b) singleton, intrauterine pregnancy, c) $\leq 16$ weeks gestation at recruitment, and d) fluency in English. Exclusion criteria were a) presence of congenital mal-formations or fetal chromosomal abnormalities; b) presence of | GA & BW – medical records                                                                                                                                                  |

| Cohort name                                                                                  | # of samples included [% out of 6646] / # of samples not included [% out of 5825] <sup>a</sup> (sample selection criteria)                                                                         | Sample description                                                                                                                                                                                                                                                | Eligibility criteria                                                                                                                                                                                                                                                                                                               | Primary method for obtaining birth outcomes                                                                                                                        |
|----------------------------------------------------------------------------------------------|----------------------------------------------------------------------------------------------------------------------------------------------------------------------------------------------------|-------------------------------------------------------------------------------------------------------------------------------------------------------------------------------------------------------------------------------------------------------------------|------------------------------------------------------------------------------------------------------------------------------------------------------------------------------------------------------------------------------------------------------------------------------------------------------------------------------------|--------------------------------------------------------------------------------------------------------------------------------------------------------------------|
|                                                                                              |                                                                                                                                                                                                    |                                                                                                                                                                                                                                                                   | any conditions that may dysregulate endocrine, immune or oxidative state or systemic inflammation, such as autoimmune disorders requiring chronic systemic steroid or immunomodulator use.                                                                                                                                         |                                                                                                                                                                    |
| University of California - Markers of Autism Risk in Babies – Learning Early Signs (MARBLES) | 284 [4.3%] / 82 [1.4%] (all participants with an available urine sample who had birth outcome data or were still pregnant were included)                                                           | Pregnant women who have a biological child diagnosed with autism spectrum disorder (ASD) and the offspring of the current pregnancy, recruited from the California Department of Developmental Services list of families receiving services for a child with ASD. | Eligible women a) had one or more biological child(ren) or first-degree relatives with ASD or the gestating child had an older half-sibling with ASD; b) was $\geq 18$ years old; d) was proficient in English and the gestating child would be taught to speak English; e) lived within 2.5 hours of the Davis/Sacramento region. | GA – ultrasound dating from the medical records; when it was not available, it was calculated from LMP based on maternal self-report<br>BW – medical records       |
| New Hampshire Birth Cohort Study (NHBCS)                                                     | 1317 [19.8%] / 994 [17.1%] (urine samples with sufficient volume available selected from participants on whom we measured urinary tobacco biomarkers and who had completed a survey about smoking) | Pregnant women recruited from prenatal clinics in the rural New Hampshire and their offspring.                                                                                                                                                                    | Eligible women were 18-45 years old, spoke English, had singleton pregnancies, and used a private, unregulated water system (e.g., private well) at home.                                                                                                                                                                          | GA – ultrasounds occurring between 11 and 13 weeks when possible; otherwise, estimated using the LMP date<br>BW – medical records                                  |
| The NYU Children’s Health and Environment Study (NYU CHES)                                   | 208 [3.1%] / 666 [11.4%] (randomly selected urine samples from women who provided urine in the 3 <sup>rd</sup> trimester and included those who provided postnatal consent)                        | Pregnant women recruited from prenatal clinics at NYU Langone Medical Center study sites.                                                                                                                                                                         | Eligible women were $\geq 18$ years old, $< 18$ weeks gestation, not carrying a medically threatened pregnancy, and intending to deliver at one of three NYU-affiliated hospitals.                                                                                                                                                 | GA & BW – primarily used electronic medical records; in case of missing data because the participant delivered outside NYU, self-report via questionnaire was used |

| Cohort name                                                                           | # of samples included [% out of 6646] / # of samples not included [% out of 5825] <sup>a</sup> (sample selection criteria) | Sample description                                                                                                                                                     | Eligibility criteria                                                                                                                                                                                                                          | Primary method for obtaining birth outcomes                                                                                    |
|---------------------------------------------------------------------------------------|----------------------------------------------------------------------------------------------------------------------------|------------------------------------------------------------------------------------------------------------------------------------------------------------------------|-----------------------------------------------------------------------------------------------------------------------------------------------------------------------------------------------------------------------------------------------|--------------------------------------------------------------------------------------------------------------------------------|
| Pregnancy Environment and Lifestyle Study (PETALS)                                    | 349 [5.3%] / 1076 [18.5%] (all participants who signed an ECHO consent by the time of sample selection) <sup>b</sup>       | Women identified as pregnant via hospital records from 4 California hospitals recruited before 10 weeks gestation via telephone and their offspring.                   | Eligible women were aged 18–45 years, able to provide informed consent in English, had singleton pregnancies, and did not have a pre-conception history of diabetes, cancer, hepatitis C, or liver cirrhosis.                                 | GA – calculated from EDD from medical records and confirmed with ultrasound<br>BW – medical records                            |
| Rochester                                                                             | 280 [4.2%] / 16 [0.3%] (all participants with a urine sample from the 2 <sup>nd</sup> and 3 <sup>rd</sup> trimesters)      | Women recruited during the first trimester of pregnancy from clinics in Rochester, NY serving high psychosocial risk populations, oversampled for psychosocial stress. | Eligible women were ≥18 years old, had singleton pregnancies, and had no known substance abuse issues or history of psychotic illness, no major endocrine disorder, high-risk health condition, or significant obstetric concern at baseline. | GA – medical records (generally based on earliest ultrasound)<br>BW – medical records                                          |
| The Infant Development and the Environment Study (TIDES)                              | 612 [9.2%] / 167 [2.9%] (randomly selected from those with ECHO consent and urine available) <sup>b</sup>                  | Pregnant women recruited during the first trimester from prenatal clinics in Minnesota, New York, California, and Washington, and their offspring.                     | Eligible women were ≥18 years old, with a non-medically threatened singleton pregnancy and able to communicate in English.                                                                                                                    | GA – ultrasound dating from the medical records; when it was not available, it was calculated from LMP<br>BW – medical records |
| Vitamin C to Decrease Effects of Smoking in Pregnancy on Infant Lung Function (VCSIP) | 99 [1.5%] / 124 [2.1%] (all participants who signed an ECHO consent) <sup>b</sup>                                          | Pregnant women who smoke receiving prenatal care at 3 clinics across the US (Indiana, Washington, Oregon) and their offspring.                                         | Eligible women were at least 15 years old, pregnant with randomization prior to 22 weeks of gestation, cigarette smoker, singleton gestation, English speaking, and receiving prenatal care at clinics delivering at specific locations.      | GA – calculated from EDD from medical records and confirmed with ultrasound;<br>BW – medical records                           |

Note: BW, birth weight; ECHO, Environmental influences on Child Health Outcomes; EDD, estimated date of delivery; GA, gestational age; LMP, last menstrual period.

<sup>a</sup>Among participants from 16 cohorts, 6646 pregnant people were included in this study, and 5825 pregnant people not included.

Percentage of samples included in this study = (number of samples in each cohort included in this study / 6646) \* 100;

Percentage of samples not included in this study = (number of samples in each cohort not included in this study / 5825) \* 100

<sup>b</sup>Cohorts that were recruited prior to the beginning of ECHO recontacted participants once ECHO began and to sign a second consent form to participate in ECHO.

**Table S2.** Information on nine OPE biomarkers quantified in prenatal maternal serum samples in the ECHO cohorts.

| <b>OPE biomarker</b>                                                 | <b>Parent compound</b>                                   |
|----------------------------------------------------------------------|----------------------------------------------------------|
| Diphenyl phosphate (DPHP)                                            | Triphenyl phosphate (TPHP)                               |
| Composite of dibutyl phosphate and di-isobutyl phosphate (DBUP/DIBP) | Tributyl phosphate (TBUP), tri-isobutyl phosphate (TIBP) |
| Bis(1,3-dichloro-2-propyl) phosphate (BDCPP)                         | Tris(1,3-dichloro-2-propyl) phosphate (TDCPP)            |
| Bis(2-chloroethyl) phosphate (BCETP)                                 | Tris(2-chloroethyl) phosphate (TCETP)                    |
| Bis(butoxyethyl) phosphate (BBOEP)                                   | Tris (2-butoxyethyl) phosphate (TBOEP)                   |
| Bis(1-chloro-2-propyl) phosphate (BCPP)                              | Tris(1-chloro-2-propyl) phosphate (TCPP)                 |
| Bis(2-methylphenyl) phosphate (BMPP)                                 | Tris(2-methylphenyl) phosphate (TMPP)                    |
| Bis(2-ethylhexyl) phosphate (BEHP)                                   | Tris(2-ethylhexyl) phosphate (TEHP)                      |
| Dipropyl phosphate (DPRP)                                            | Tripropyl phosphate (TPRP)                               |

Note: ECHO, Environmental influences on Child Health Outcomes; OPE, organophosphate ester.

**Table S3.** Demographic characteristics of participants from 16 ECHO cohorts by study sample inclusion status.

| Characteristics                                       | Included<br>( <i>n</i> =6646)<br><i>n</i> (%) <sup>a</sup> | Not included<br>( <i>n</i> =5825)<br><i>n</i> (%) <sup>a</sup> |
|-------------------------------------------------------|------------------------------------------------------------|----------------------------------------------------------------|
| <b>Maternal race/ethnicity</b>                        |                                                            |                                                                |
| Non-Hispanic White                                    | 3470 (52.5%)                                               | 2575 (44.9%)                                                   |
| Non-Hispanic Black                                    | 1288 (19.5%)                                               | 911 (15.9%)                                                    |
| Hispanic                                              | 1251 (18.9%)                                               | 1614 (28.1%)                                                   |
| Other races <sup>b</sup>                              | 597 (9.0%)                                                 | 634 (11.1%)                                                    |
| Missing                                               | 40                                                         | 91                                                             |
| <b>Maternal education</b>                             |                                                            |                                                                |
| Less than high school                                 | 535 (8.6%)                                                 | 487 (9.5%)                                                     |
| High school degree, GED or equivalent                 | 1337 (21.4%)                                               | 869 (17.0%)                                                    |
| Some college, no/associate degree, trade school       | 1115 (17.9%)                                               | 1311 (25.6%)                                                   |
| Bachelor's degree                                     | 1727 (27.7%)                                               | 1253 (24.5%)                                                   |
| Masters, professional, or doctorate degree            | 1522 (24.4%)                                               | 1204 (23.5%)                                                   |
| Missing                                               | 410                                                        | 701                                                            |
| <b>Maternal marital status</b>                        |                                                            |                                                                |
| Married or living with a partner                      | 4768 (76.2%)                                               | 3755 (74.2%)                                                   |
| Widowed, separated, divorced                          | 280 (4.5%)                                                 | 182 (3.6%)                                                     |
| Single, never married, partnered, not living together | 1213 (19.4%)                                               | 1127 (22.3%)                                                   |
| Missing                                               | 385                                                        | 761                                                            |
| <b>Maternal age at delivery (year)</b>                |                                                            |                                                                |
| <20                                                   | 209 (3.1%)                                                 | 580 (10.0%)                                                    |
| 20-24                                                 | 975 (14.7%)                                                | 836 (14.4%)                                                    |
| 25-29                                                 | 1653 (24.9%)                                               | 1268 (21.8%)                                                   |
| 30-34                                                 | 2218 (33.4%)                                               | 1745 (30.0%)                                                   |
| 35-39                                                 | 1290 (19.4%)                                               | 1126 (19.3%)                                                   |
| ≥40                                                   | 301 (4.5%)                                                 | 270 (4.6%)                                                     |
| <b>Parity</b>                                         |                                                            |                                                                |
| 0                                                     | 2566 (42.8%)                                               | 2493 (51.9%)                                                   |
| 1                                                     | 1994 (33.3%)                                               | 1521 (31.6%)                                                   |
| ≥2                                                    | 1436 (23.9%)                                               | 793 (16.5%)                                                    |
| Missing                                               | 650                                                        | 1018                                                           |
| <b>Pre-pregnancy BMI (kg/m<sup>2</sup>)</b>           |                                                            |                                                                |
| <25                                                   | 3043 (48.8%)                                               | 2233 (49.4%)                                                   |
| 25-30                                                 | 1641 (26.3%)                                               | 1185 (26.2%)                                                   |
| >30                                                   | 1552 (24.9%)                                               | 1099 (24.3%)                                                   |
| Missing                                               | 410                                                        | 1308                                                           |
| <b>Tobacco use during pregnancy</b>                   |                                                            |                                                                |
| No                                                    | 5123 (92.8%)                                               | 4170 (92.8%)                                                   |
| Yes                                                   | 396 (7.2%)                                                 | 324 (7.2%)                                                     |
| Missing                                               | 1127                                                       | 1331                                                           |
| <b>Child's sex</b>                                    |                                                            |                                                                |



|        |              |              |
|--------|--------------|--------------|
| Female | 3250 (48.9%) | 2844 (49.9%) |
| Male   | 3396 (51.1%) | 2851 (50.1%) |

---

Note: BMI, body mass index; ECHO, Environmental influences on Child Health Outcomes; GED, general educational development.

<sup>a</sup>Percentage was calculated without missing observations.

<sup>b</sup>Other races include Asian, native Hawaiian or other Pacific Islanders, American Indian or Alaska native, and multiple race.

**Table S4.** Distributions of urinary dilution-standardized OPE biomarker concentrations by ECHO cohort.

| Cohort name   | DPHP                                                      | DBUP/DIBP            | BDCPP                | BCETP                | BBOEP                | BCPP                 | BMPP                 | BEHP                 | DPRP                 |
|---------------|-----------------------------------------------------------|----------------------|----------------------|----------------------|----------------------|----------------------|----------------------|----------------------|----------------------|
|               | Median (25 <sup>th</sup> , 75 <sup>th</sup> , percentile) |                      |                      |                      |                      |                      |                      |                      |                      |
| All           | 0.92<br>(0.54, 1.78)                                      | 0.19<br>(0.12, 0.30) | 0.86<br>(0.31, 1.70) | 0.52<br>(<LOD, 1.58) | 0.05<br>(<LOD, 0.09) | 0.12<br>(<LOD, 0.75) | <LOD<br>(<LOD, 0.03) | <LOD<br>(<LOD, 0.04) | <LOD<br>(<LOD, 0.03) |
| Atlanta ECHO  | 1.49<br>(1.17, 2.43)                                      | 0.17<br>(0.11, 0.30) | 1.28<br>(0.81, 2.09) | 0.55<br>(<LOD, 1.32) | 0.04<br>(<LOD, 0.09) | 0.11<br>(<LOD, 0.60) | 0.06<br>(0.03, 0.08) | <LOD<br>(<LOD, <LOD) | <LOD<br>(<LOD, <LOD) |
| CANDLE        | 1.15<br>(0.72, 2.34)                                      | 0.21<br>(0.15, 0.31) | 1.15<br>(0.45, 2.08) | 0.91<br>(0.22, 2.51) | 0.05<br>(<LOD, 0.10) | <LOD<br>(<LOD, 0.70) | <LOD<br>(<LOD, 0.04) | <LOD<br>(<LOD, 0.04) | <LOD<br>(<LOD, 0.03) |
| CIOB          | 0.50<br>(0.33, 1.05)                                      | 0.14<br>(0.09, 0.25) | 0.38<br>(0.08, 0.86) | 0.14<br>(<LOD, 0.68) | <LOD<br>(<LOD, 0.05) | 0.14<br>(<LOD, 0.57) | <LOD<br>(<LOD, <LOD) | <LOD<br>(<LOD, 0.03) | <LOD<br>(<LOD, 0.07) |
| EARLI         | 1.06<br>(0.62, 1.70)                                      | 0.15<br>(0.12, 0.22) | 0.94<br>(0.37, 1.77) | 1.04<br>(0.36, 2.46) | 0.04<br>(<LOD, 0.07) | 0.49<br>(0.06, 1.19) | 0.02<br>(<LOD, 0.07) | <LOD<br>(<LOD, 0.02) | <LOD<br>(<LOD, 0.05) |
| Fair Start    | 0.97<br>(0.60, 1.94)                                      | 0.21<br>(0.16, 0.33) | 0.83<br>(0.25, 1.70) | 0.26<br>(<LOD, 1.51) | 0.06<br>(<LOD, 0.11) | 0.25<br>(<LOD, 0.98) | <LOD<br>(<LOD, 0.03) | <LOD<br>(<LOD, 0.09) | <LOD<br>(<LOD, <LOD) |
| Healthy Start | 1.18<br>(0.73, 2.04)                                      | 0.15<br>(0.11, 0.22) | 1.02<br>(0.55, 2.01) | 0.77<br>(0.29, 1.79) | 0.04<br>(<LOD, 0.07) | 0.27<br>(<LOD, 0.83) | <LOD<br>(<LOD, 0.04) | <LOD<br>(<LOD, <LOD) | <LOD<br>(<LOD, <LOD) |
| IKIDS         | 1.14<br>(0.76, 1.74)                                      | 0.16<br>(0.11, 0.24) | 0.91<br>(0.31, 1.72) | 0.47<br>(<LOD, 1.25) | 0.06<br>(0.03, 0.10) | 0.35<br>(<LOD, 0.90) | <LOD<br>(<LOD, 0.04) | <LOD<br>(<LOD, 0.02) | <LOD<br>(<LOD, <LOD) |
| MADRES        | 0.77<br>(0.47, 1.46)                                      | 0.18<br>(0.12, 0.26) | 1.29<br>(0.61, 2.29) | 0.52<br>(<LOD, 1.62) | 0.04<br>(<LOD, 0.07) | 0.17<br>(<LOD, 0.77) | <LOD<br>(<LOD, 0.03) | <LOD<br>(<LOD, 0.02) | <LOD<br>(<LOD, <LOD) |
| Magee         | 1.02<br>(0.59, 1.51)                                      | 0.19<br>(0.13, 0.32) | 0.89<br>(0.39, 1.85) | 0.29<br>(<LOD, 1.12) | 0.05<br>(<LOD, 0.09) | 0.59<br>(<LOD, 1.17) | <LOD<br>(<LOD, 0.04) | <LOD<br>(<LOD, 0.08) | <LOD<br>(<LOD, 0.04) |
| MARBLES       | 0.94<br>(0.63, 1.67)                                      | 0.17<br>(0.11, 0.27) | 0.97<br>(0.36, 1.98) | 0.74<br>(0.23, 1.53) | 0.04<br>(<LOD, 0.08) | 0.38<br>(<LOD, 1.03) | <LOD<br>(<LOD, 0.03) | <LOD<br>(<LOD, 0.04) | <LOD<br>(<LOD, <LOD) |
| NHBCS         | 0.61<br>(0.28, 1.38)                                      | 0.17<br>(0.10, 0.30) | 0.46<br>(0.12, 1.03) | 0.23<br>(<LOD, 0.95) | 0.05<br>(<LOD, 0.10) | 0.03<br>(<LOD, 0.57) | <LOD<br>(<LOD, 0.03) | <LOD<br>(<LOD, <LOD) | <LOD<br>(<LOD, 0.04) |
| NYU CHES      | 0.99<br>(0.58, 1.80)                                      | 0.45<br>(0.26, 0.81) | 0.45<br>(0.08, 1.42) | 0.03<br>(<LOD, 1.17) | 0.04<br>(<LOD, 0.09) | <LOD<br>(<LOD, 0.66) | <LOD<br>(<LOD, <LOD) | <LOD<br>(<LOD, 0.14) | <LOD<br>(<LOD, <LOD) |
| PETALS        | 0.89<br>(0.58, 1.59)                                      | 0.19<br>(0.12, 0.34) | 1.06<br>(0.51, 1.94) | 0.64<br>(<LOD, 2.40) | 0.05<br>(<LOD, 0.10) | 0.24<br>(<LOD, 0.92) | <LOD<br>(<LOD, 0.02) | <LOD<br>(<LOD, 0.13) | <LOD<br>(<LOD, <LOD) |
| Rochester     | 0.99<br>(0.63, 1.71)                                      | 0.18<br>(0.12, 0.27) | 1.17<br>(0.55, 2.13) | 0.29<br>(<LOD, 1.32) | 0.05<br>(<LOD, 0.09) | 0.27<br>(<LOD, 0.77) | <LOD<br>(<LOD, 0.04) | <LOD<br>(<LOD, 0.04) | <LOD<br>(<LOD, 0.04) |
| TIDES         | 1.03<br>(0.58, 3.11)                                      | 0.18<br>(0.13, 0.31) | 0.66<br>(0.22, 1.46) | 0.50<br>(<LOD, 1.47) | 0.05<br>(<LOD, 0.10) | <LOD<br>(<LOD, 0.53) | <LOD<br>(<LOD, 0.02) | <LOD<br>(<LOD, 0.12) | <LOD<br>(<LOD, 0.03) |
| VCSIP         | 0.92<br>(0.62, 2.12)                                      | 0.18<br>(0.13, 0.30) | 1.04<br>(0.57, 1.56) | 0.49<br>(0.17, 1.27) | 0.04<br>(<LOD, 0.07) | 0.17<br>(<LOD, 0.75) | <LOD<br>(<LOD, 0.03) | <LOD<br>(<LOD, 0.04) | <LOD<br>(<LOD, <LOD) |

Note: LOD values were 0.04 ng/mL for DBUP/DIBP, 0.03 ng/mL for DPHP and DPRP, 0.02 ng/mL for BDCPP, BCETP, BBOEP, BCPP, and BEHP, and 0.01 ng/mL for BMPP. BBOEP, bis(butoxyethyl) phosphate; BCETP, bis(2-chloroethyl) phosphate; BCPP, bis(1-chloro-2-propyl) phosphate; BDCPP, bis(1,3-dichloro-2-propyl) phosphate; BEHP, bis(2-ethylhexyl) phosphate; BMPP, bis(2-methylphenyl) phosphate; DBUP/DIBP, composite of dibutyl phosphate and di-isobutyl phosphate; DPHP, diphenyl phosphate; DPRP, dipropyl phosphate; ECHO, Environmental influences on Child Health Outcomes; OPE, organophosphate ester. Cohort names are provided in Table S1.

**Table S5.** Spearman’s correlation coefficients among urinary dilution-standardized OPE biomarker concentrations among 6646 ECHO pregnant participants.

| OPE biomarker | DPHP  | DBUP/<br>DIBP    | BDCPP            | BCETP            | BBOEP            | BCPP             | BMPP             | BEHP              | DPRP              |
|---------------|-------|------------------|------------------|------------------|------------------|------------------|------------------|-------------------|-------------------|
| DPHP          | 1.000 | 0.167<br>(<.001) | 0.262<br>(<.001) | 0.189<br>(<.001) | 0.092<br>(<.001) | 0.018<br>(0.148) | 0.020<br>(0.105) | 0.046<br>(<.001)  | -0.054<br>(<.001) |
| DBUP/DIBP     |       | 1.000            | 0.077<br>(<.001) | 0.063<br>(<.001) | 0.195<br>(<.001) | 0.040<br>(0.001) | 0.010<br>(0.422) | 0.253<br>(<.001)  | 0.081<br>(<.001)  |
| BDCPP         |       |                  | 1.000            | 0.149<br>(<.001) | 0.088<br>(<.001) | 0.106<br>(<.001) | 0.118<br>(<.001) | 0.053<br>(<.001)  | 0.004<br>(0.759)  |
| BCETP         |       |                  |                  | 1.000            | 0.058<br>(<.001) | 0.079<br>(<.001) | 0.037<br>(0.003) | -0.017<br>(0.179) | 0.045<br>(<.001)  |
| BBOEP         |       |                  |                  |                  | 1.000            | 0.056<br>(<.001) | 0.116<br>(<.001) | 0.127<br>(<.001)  | 0.087<br>(<.001)  |
| BCPP          |       |                  |                  |                  |                  | 1.000            | 0.216<br>(<.001) | 0.058<br>(<.001)  | 0.166<br>(<.001)  |
| BMPP          |       |                  |                  |                  |                  |                  | 1.000            | 0.019<br>(0.128)  | 0.243<br>(<.001)  |
| BEHP          |       |                  |                  |                  |                  |                  |                  | 1.000             | 0.126<br>(<.001)  |
| DPRP          |       |                  |                  |                  |                  |                  |                  |                   | 1.000             |

Note: Numbers in cells indicate Spearman’s correlation coefficients (*p*-values). BBOEP, bis(butoxyethyl) phosphate; BCETP, bis(2-chloroethyl) phosphate; BCPP, bis(1-chloro-2-propyl) phosphate; BDCPP, bis(1,3-dichloro-2-propyl) phosphate; BEHP, bis(2-ethylhexyl) phosphate; BMPP, bis(2-methylphenyl) phosphate; DBUP/DIBP, composite of dibutyl phosphate and di-isobutyl phosphate; DPHP, diphenyl phosphate; DPRP, dipropyl phosphate; ECHO, Environmental influences on Child Health Outcomes; OPE, organophosphate ester.

**Table S6.** Analysis results of urinary OPE biomarker concentrations in 191 blinded duplicate samples.

| OPE biomarkers | LOD (ng/mL) | % >LOD (n=6646) | # of valid duplicate pairs (%) <sup>a</sup> | RPD <sup>b</sup> median (%) | # of discordant pairs (%) <sup>c</sup> | # of concordant pairs (%) <sup>d</sup> |
|----------------|-------------|-----------------|---------------------------------------------|-----------------------------|----------------------------------------|----------------------------------------|
| DPHP           | 0.03        | 99.5            | 191 (100%)                                  | 6.2                         | 0 (0%)                                 | 0 (0%)                                 |
| DBUP/DIBP      | 0.04        | 95              | 179 (94%)                                   | 16.9                        | 12 (6%)                                | 0 (0%)                                 |
| BDCPP          | 0.02        | 87              | 163 (85%)                                   | 12.3                        | 19 (10%)                               | 9 (5%)                                 |
| BCETP          | 0.02        | 69              | 127 (66%)                                   | 13.3                        | 35 (18%)                               | 29 (15%)                               |
| BBOEP          | 0.02        | 66              | 99 (52%)                                    | 18.3                        | 78 (41%)                               | 14 (7%)                                |
| BCPP           | 0.02        | 53              | 71 (37%)                                    | 26.6                        | 68 (36%)                               | 52 (27%)                               |
| BMPP           | 0.01        | 36              | 38 (20%)                                    | 17.8                        | 59 (31%)                               | 94 (49%)                               |
| BEHP           | 0.02        | 30              | 21 (11%)                                    | 53.6                        | 64 (34%)                               | 106 (55%)                              |
| DPRP           | 0.03        | 25              | 9 (5%)                                      | 32.7                        | 51 (27%)                               | 131 (69%)                              |

Note: A total of 191 duplicate samples is the sum of the number of valid duplicate pairs, discordant pairs, and concordant pairs. BBOEP, bis(butoxyethyl) phosphate; BCETP, bis(2-chloroethyl) phosphate; BCPP, bis(1-chloro-2-propyl) phosphate; BDCPP, bis(1,3-dichloro-2-propyl) phosphate; BEHP, bis(2-ethylhexyl) phosphate; BMPP, bis(2-methylphenyl) phosphate; DBUP/DIBP, composite of dibutyl phosphate and di-isobutyl phosphate; DPHP, diphenyl phosphate; DPRP, dipropyl phosphate; LOD, limit of detection; OPE, organophosphate ester; RPD, relative percent difference.

<sup>a</sup>Number of duplicate pairs where both were  $\geq$ LOD.

<sup>b</sup>RPD =  $|$ sample result – repeat result $|$  / (sample result + repeat result) \* 100.

<sup>c</sup>Number of duplicate pairs where one was <LOD and the other one was  $\geq$ LOD.

<sup>d</sup>Number of duplicate pairs where both were <LOD.

**Table S7.** Sex-stratified associations between prenatal maternal urinary OPE biomarkers and gestational duration in the ECHO cohorts and *p*-value for the interaction term between child’s sex and OPE biomarkers to test for effect measure modification.

| OPE biomarkers                                       | Sex | Gestational age (weeks)     |                         | Preterm (vs. full-term)  |                         | Early-term (vs. full-term) |                         | Late/post-term (vs. full-term) |                         |
|------------------------------------------------------|-----|-----------------------------|-------------------------|--------------------------|-------------------------|----------------------------|-------------------------|--------------------------------|-------------------------|
|                                                      |     | $\beta$ (95% CI)            | <i>p</i> <sub>int</sub> | OR (95% CI)              | <i>p</i> <sub>int</sub> | OR (95% CI)                | <i>p</i> <sub>int</sub> | OR (95% CI)                    | <i>p</i> <sub>int</sub> |
| Continuous (log2-transformed, dilution-standardized) |     |                             |                         |                          |                         |                            |                         |                                |                         |
| DPHP                                                 | F   | <b>-0.03 (-0.06, -0.01)</b> | <b>0.01</b>             | <b>1.12 (1.05, 1.19)</b> | <b>&lt;0.01</b>         | 1.01 (0.96, 1.05)          | <b>0.02</b>             | 1.00 (0.93, 1.07)              | 0.99                    |
|                                                      | M   | <b>0.02 (0.00, 0.04)</b>    |                         | 0.97 (0.86, 1.09)        |                         | 0.98 (0.90, 1.07)          |                         | 1.00 (0.96, 1.04)              |                         |
| DBUP/DIBP                                            | F   | <b>-0.03 (-0.06, 0.00)</b>  | 0.46                    | <b>1.09 (1.03, 1.16)</b> | 0.33                    | 0.99 (0.91, 1.09)          | 1.00                    | 1.00 (0.92, 1.07)              | 0.96                    |
|                                                      | M   | -0.01 (-0.08, 0.06)         |                         | 1.00 (0.93, 1.09)        |                         | 1.00 (0.93, 1.08)          |                         | 1.00 (0.98, 1.01)              |                         |
| BDCPP                                                | F   | -0.01 (-0.02, 0.01)         | 0.91                    | 1.00 (0.97, 1.04)        | 0.94                    | 0.99 (0.97, 1.01)          | <b>0.10</b>             | 1.00 (0.98, 1.02)              | 0.17                    |
|                                                      | M   | -0.01 (-0.02, 0.02)         |                         | 1.00 (0.94, 1.06)        |                         | 1.01 (0.97, 1.05)          |                         | 0.99 (0.96, 1.02)              |                         |
| High/Low (compared with nondetect)                   |     |                             |                         |                          |                         |                            |                         |                                |                         |
| BCETP – Low                                          | F   | -0.08 (-0.21, 0.06)         | 0.24                    | 1.18 (0.90, 1.55)        | 0.11                    | 0.94 (0.73, 1.23)          | 0.86                    | <b>0.82 (0.71, 0.96)</b>       | 0.95                    |
|                                                      | M   | 0.05 (-0.08, 0.18)          |                         | 0.80 (0.56, 1.14)        |                         | 0.96 (0.78, 1.19)          |                         | 0.84 (0.68, 1.04)              |                         |
| BCETP – High                                         | F   | <b>-0.13 (-0.24, -0.03)</b> | <b>&lt;0.01</b>         | <b>1.27 (1.03, 1.58)</b> | <b>&lt;0.01</b>         | 0.96 (0.86, 1.07)          | 0.96                    | 0.96 (0.83, 1.11)              | 0.76                    |
|                                                      | M   | 0.06 (-0.06, 0.18)          |                         | 0.77 (0.55, 1.06)        |                         | 0.97 (0.77, 1.21)          |                         | 0.92 (0.72, 1.17)              |                         |
| BBOEP – Low                                          | F   | 0.07 (-0.08, 0.21)          | 0.15                    | 0.88 (0.61, 1.28)        | 0.17                    | 0.84 (0.69, 1.02)          | 0.15                    | 0.95 (0.77, 1.17)              | 0.48                    |
|                                                      | M   | -0.07 (-0.18, 0.05)         |                         | 1.26 (0.93, 1.70)        |                         | 1.00 (0.78, 1.27)          |                         | 1.11 (0.82, 1.49)              |                         |
| BBOEP – High                                         | F   | -0.07 (-0.23, 0.09)         | 0.87                    | 1.32 (0.99, 1.76)        | 0.79                    | <b>0.75 (0.60, 0.94)</b>   | <b>0.03</b>             | 0.95 (0.69, 1.31)              | 0.36                    |
|                                                      | M   | -0.08 (-0.21, 0.04)         |                         | 1.19 (0.90, 1.57)        |                         | 1.10 (0.89, 1.35)          |                         | 1.11 (0.84, 1.47)              |                         |
| BCPP – Low                                           | F   | 0.06 (-0.05, 0.18)          | 0.97                    | 0.81 (0.62, 1.05)        | 0.65                    | 1.12 (0.95, 1.32)          | 0.42                    | 1.06 (0.82, 1.36)              | 0.26                    |
|                                                      | M   | 0.09 (-0.02, 0.20)          |                         | 0.85 (0.63, 1.13)        |                         | 0.99 (0.82, 1.20)          |                         | <b>1.24 (1.04, 1.48)</b>       |                         |
| BCPP – High                                          | F   | -0.02 (-0.12, 0.08)         | 0.73                    | 0.96 (0.72, 1.27)        | 0.76                    | <b>1.25 (1.03, 1.51)</b>   | 0.57                    | 1.03 (0.84, 1.28)              | 0.56                    |
|                                                      | M   | -0.03 (-0.13, 0.07)         |                         | 0.99 (0.74, 1.32)        |                         | 1.13 (0.94, 1.37)          |                         | 1.10 (0.90, 1.35)              |                         |
| Detect (compared with nondetect)                     |     |                             |                         |                          |                         |                            |                         |                                |                         |
| BMPP                                                 | F   | -0.05 (-0.15, 0.05)         | 0.64                    | 0.94 (0.75, 1.17)        | 0.50                    | 1.03 (0.88, 1.21)          | 0.93                    | 0.90 (0.69, 1.18)              | 0.20                    |
|                                                      | M   | 0.00 (-0.13, 0.12)          |                         | 1.01 (0.77, 1.34)        |                         | 1.01 (0.81, 1.26)          |                         | 1.02 (0.89, 1.17)              |                         |
| BEHP                                                 | F   | -0.12 (-0.27, 0.02)         | 0.21                    | 1.07 (0.78, 1.46)        | 0.62                    | 1.05 (0.89, 1.24)          | 0.59                    | <b>0.75 (0.60, 0.94)</b>       | <b>0.08</b>             |
|                                                      | M   | -0.02 (-0.16, 0.11)         |                         | 0.99 (0.78, 1.27)        |                         | 1.00 (0.79, 1.27)          |                         | 0.99 (0.90, 1.08)              |                         |
| DPRP                                                 | F   | 0.08 (-0.07, 0.23)          | 0.84                    | 0.94 (0.64, 1.38)        | 0.85                    | 1.08 (0.90, 1.29)          | 0.51                    | <b>1.25 (1.02, 1.52)</b>       | 0.35                    |
|                                                      | M   | 0.08 (-0.02, 0.19)          |                         | 0.97 (0.74, 1.28)        |                         | 1.00 (0.83, 1.20)          |                         | 1.02 (0.89, 1.18)              |                         |

Note: Sample size of each birth outcome by child’s sex is presented in Table 2. Regression models were adjusted for maternal race/ethnicity, maternal age at delivery, maternal education, maternal marital status, maternal pre-pregnancy BMI, maternal smoking during pregnancy, parity, and sample collection season and year. Estimates with *p*-values less than 0.05 and interaction term (child’s sex × OPE) with *p*-values less than 0.1 are highlighted in bold. BBOEP, bis(butoxyethyl) phosphate; BCETP, bis(2-chloroethyl) phosphate; BCPP, bis(1-chloro-2-propyl) phosphate; BDCPP, bis(1,3-dichloro-2-propyl) phosphate; BEHP, bis(2-ethylhexyl)

phosphate; BMPP, bis(2-methylphenyl) phosphate; BW-GA, birth weight-for-gestational-age; CI, confidence interval; DBUP/DIBP, composite of dibutyl phosphate and di-isobutyl phosphate; DPHP, diphenyl phosphate; DPRP, dipropyl phosphate; ECHO, Environmental influences on Child Health Outcomes; F, female; LBW, low birth weight; M, male; OPE, organophosphate ester; OR, odds ratio.

**Table S8.** Sex-stratified associations between prenatal maternal urinary OPE biomarkers and fetal growth in the ECHO cohorts and *p*-value for the interaction term between child’s sex and OPE biomarkers to test for effect measure modification.

| OPE biomarkers                                       | Sex | Term LBW                   |                         |                                 |                         |                          |                         |                          |                         |
|------------------------------------------------------|-----|----------------------------|-------------------------|---------------------------------|-------------------------|--------------------------|-------------------------|--------------------------|-------------------------|
|                                                      |     | BW-GA z-score              |                         | (vs. term non-LBW) <sup>a</sup> |                         | SGA                      |                         | LGA                      |                         |
|                                                      |     | $\beta$ (95% CI)           | <i>p</i> <sub>int</sub> | OR (95% CI)                     | <i>p</i> <sub>int</sub> | $\beta$ (95% CI)         | <i>p</i> <sub>int</sub> | OR (95% CI)              | <i>p</i> <sub>int</sub> |
| Continuous (log2-transformed, dilution-standardized) |     |                            |                         |                                 |                         |                          |                         |                          |                         |
| DPHP                                                 | F   | <b>-0.02 (-0.03, 0.00)</b> | 0.28                    | 1.02 (0.87, 1.19)               | 0.27                    | 1.03 (0.97, 1.09)        | 0.48                    | 0.98 (0.92, 1.04)        | <b>0.03</b>             |
|                                                      | M   | -0.03 (-0.06, 0.01)        |                         | <b>1.10 (1.01, 1.21)</b>        |                         | 1.08 (0.96, 1.22)        |                         | <b>0.95 (0.91, 1.00)</b> |                         |
| DBUP/DIBP                                            | F   | -0.02 (-0.05, 0.02)        | 0.93                    | 0.90 (0.74, 1.09)               | 0.76                    | 1.04 (0.95, 1.15)        | 0.63                    | 0.93 (0.85, 1.01)        | 0.21                    |
|                                                      | M   | -0.02 (-0.04, 0.01)        |                         | 0.94 (0.77, 1.14)               |                         | 0.99 (0.91, 1.07)        |                         | 1.01 (0.96, 1.06)        |                         |
| BDCPP                                                | F   | -0.01 (-0.02, 0.01)        | 0.87                    | 0.97 (0.93, 1.02)               | 0.50                    | 1.01 (0.97, 1.05)        | 0.20                    | 0.99 (0.96, 1.01)        | 0.53                    |
|                                                      | M   | 0.00 (-0.01, 0.00)         |                         | 0.99 (0.94, 1.04)               |                         | <b>0.96 (0.94, 0.99)</b> |                         | 0.98 (0.96, 1.01)        |                         |
| High/Low (compared with nondetect)                   |     |                            |                         |                                 |                         |                          |                         |                          |                         |
| BCETP – Low                                          | F   | 0.05 (-0.04, 0.14)         | 0.35                    | 1.01 (0.62, 1.65)               | 0.44                    | 1.09 (0.76, 1.57)        | <b>0.02</b>             | <b>1.28 (1.04, 1.56)</b> | <b>&lt;0.01</b>         |
|                                                      | M   | 0.02 (-0.08, 0.11)         |                         | 0.86 (0.43, 1.71)               |                         | <b>0.73 (0.55, 0.97)</b> |                         | 0.99 (0.82, 1.20)        |                         |
| BCETP – High                                         | F   | 0.01 (-0.10, 0.12)         | 0.85                    | 0.67 (0.37, 1.22)               | 0.19                    | 0.85 (0.59, 1.22)        | 0.96                    | 1.02 (0.76, 1.35)        | 0.71                    |
|                                                      | M   | 0.04 (-0.02, 0.10)         |                         | 1.22 (0.65, 2.30)               |                         | <b>0.77 (0.62, 0.97)</b> |                         | 1.05 (0.90, 1.23)        |                         |
| BBOEP – Low                                          | F   | 0.00 (-0.05, 0.04)         | 0.66                    | 1.05 (0.71, 1.56)               | 0.44                    | 0.91 (0.64, 1.29)        | 0.75                    | 1.03 (0.88, 1.22)        | 0.69                    |
|                                                      | M   | 0.03 (-0.08, 0.13)         |                         | 0.68 (0.29, 1.59)               |                         | 0.79 (0.47, 1.33)        |                         | 0.97 (0.77, 1.22)        |                         |
| BBOEP – High                                         | F   | 0.01 (-0.06, 0.09)         | 0.21                    | 1.07 (0.70, 1.64)               | 0.89                    | 1.10 (0.81, 1.51)        | 0.80                    | 1.07 (0.85, 1.36)        | 0.15                    |
|                                                      | M   | -0.05 (-0.17, 0.06)        |                         | 0.95 (0.60, 1.51)               |                         | 0.94 (0.64, 1.38)        |                         | 0.90 (0.74, 1.09)        |                         |
| BCPP – Low                                           | F   | 0.07 (-0.01, 0.15)         | 0.89                    | 0.92 (0.66, 1.28)               | 0.16                    | 0.88 (0.62, 1.26)        | 0.11                    | 1.09 (0.85, 1.41)        | 0.95                    |
|                                                      | M   | 0.07 (-0.04, 0.17)         |                         | 0.56 (0.30, 1.03)               |                         | <b>0.71 (0.55, 0.91)</b> |                         | 1.05 (0.89, 1.24)        |                         |
| BCPP – High                                          | F   | 0.04 (-0.06, 0.14)         | 0.16                    | 0.63 (0.34, 1.18)               | 0.27                    | 0.96 (0.66, 1.41)        | 0.13                    | 1.09 (0.88, 1.34)        | 0.47                    |
|                                                      | M   | <b>0.11 (0.03, 0.19)</b>   |                         | <b>0.36 (0.15, 0.88)</b>        |                         | <b>0.69 (0.48, 1.00)</b> |                         | 1.02 (0.83, 1.25)        |                         |
| Detect (compared with nondetect)                     |     |                            |                         |                                 |                         |                          |                         |                          |                         |
| BMPP                                                 | F   | <b>0.09 (0.02, 0.17)</b>   | 0.26                    | 1.01 (0.64, 1.62)               | 0.45                    | 0.94 (0.75, 1.18)        | 0.26                    | 1.16 (0.97, 1.38)        | 0.53                    |
|                                                      | M   | 0.05 (-0.01, 0.11)         |                         | 0.90 (0.60, 1.34)               |                         | <b>0.73 (0.55, 0.98)</b> |                         | 1.06 (0.80, 1.41)        |                         |
| BEHP                                                 | F   | -0.02 (-0.09, 0.04)        | 0.88                    | 1.28 (0.94, 1.74)               | 0.98                    | 1.09 (0.87, 1.36)        | 0.83                    | 0.91 (0.71, 1.16)        | 0.54                    |
|                                                      | M   | -0.04 (-0.12, 0.04)        |                         | 1.30 (0.67, 2.52)               |                         | 1.12 (0.86, 1.46)        |                         | 1.00 (0.81, 1.22)        |                         |
| DPRP                                                 | F   | 0.05 (-0.01, 0.10)         | 0.84                    | 0.73 (0.49, 1.09)               | 0.81                    | 0.81 (0.62, 1.05)        | 0.19                    | 1.05 (0.86, 1.27)        | 0.20                    |
|                                                      | M   | 0.03 (0.00, 0.07)          |                         | 0.70 (0.41, 1.17)               |                         | 0.97 (0.82, 1.15)        |                         | 1.13 (0.97, 1.31)        |                         |

Note: Sample size of each birth outcome by child’s sex is presented in Table 2. Regression models were adjusted for maternal race/ethnicity, maternal age at delivery, maternal education, maternal marital status, maternal pre-pregnancy BMI, maternal smoking during pregnancy, parity, and sample collection season and year. Estimates with *p*-values less than 0.05 and interaction term (child’s sex × OPE) with *p*-values less than 0.1 are highlighted in bold. BBOEP, bis(butoxyethyl) phosphate; BCETP, bis(2-chloroethyl)



phosphate; BCPP, bis(1-chloro-2-propyl) phosphate; BDCPP, bis(1,3-dichloro-2-propyl) phosphate; BEHP, bis(2-ethylhexyl) phosphate; BMPP, bis(2-methylphenyl) phosphate; BW-GA, CI, confidence interval; birth weight-for-gestational-age; DBUP/DIBP, composite of dibutyl phosphate and di-isobutyl phosphate; DPHP, diphenyl phosphate; DPRP, dipropyl phosphate; ECHO, Environmental influences on Child Health Outcomes; F, female; LBW, low birth weight; M, male; OPE, organophosphate ester; OR, odds ratio.

<sup>a</sup>LBW vs. non-LBW among 6197 non-preterm birth ( $\geq 37$  weeks gestation).

**Table S9.** Associations between prenatal maternal urinary OPE biomarkers and gestational duration in the ECHO cohorts when jointly modelling all OPE biomarkers in the same regression model.

| OPE biomarkers                                       | Gestational age (weeks)<br>[ <i>n</i> =6646] |                 | Preterm [ <i>n</i> =449]<br>(vs. full-term [ <i>n</i> =3947]) |                 | Early-term [ <i>n</i> =1436]<br>(vs. full-term [ <i>n</i> =3947]) |                 | Late/post-term [ <i>n</i> =814]<br>(vs. full-term [ <i>n</i> =3947]) |                 |
|------------------------------------------------------|----------------------------------------------|-----------------|---------------------------------------------------------------|-----------------|-------------------------------------------------------------------|-----------------|----------------------------------------------------------------------|-----------------|
|                                                      | $\beta$ (95% CI)                             | <i>p</i> -value | OR (95% CI)                                                   | <i>p</i> -value | OR (95% CI)                                                       | <i>p</i> -value | OR (95% CI)                                                          | <i>p</i> -value |
| Continuous (log2-transformed, dilution-standardized) |                                              |                 |                                                               |                 |                                                                   |                 |                                                                      |                 |
| DPHP                                                 | 0.00 (-0.02, 0.02)                           | 0.99            | 1.01 (0.95, 1.09)                                             | 0.71            | 0.98 (0.95, 1.01)                                                 | 0.14            | 1.00 (0.96, 1.05)                                                    | 0.91            |
| DBUP/DIBP                                            | -0.02 (-0.05, 0.02)                          | 0.39            | 1.06 (1.02, 1.11)                                             | 0.01            | 1.00 (0.95, 1.06)                                                 | 0.95            | 1.00 (0.97, 1.03)                                                    | 0.96            |
| BDCPP                                                | 0.00 (-0.02, 0.01)                           | 0.40            | 1.00 (0.97, 1.04)                                             | 0.94            | 1.01 (1.00, 1.02)                                                 | 0.27            | 0.99 (0.97, 1.00)                                                    | 0.07            |
| High/Low (compared with nondetect)                   |                                              |                 |                                                               |                 |                                                                   |                 |                                                                      |                 |
| BCETP – Low                                          | -0.03 (-0.12, 0.07)                          | 0.59            | 0.99 (0.79, 1.24)                                             | 0.94            | 0.95 (0.81, 1.10)                                                 | 0.47            | 0.80 (0.72, 0.90)                                                    | <0.001          |
| BCETP – High                                         | -0.03 (-0.12, 0.06)                          | 0.51            | 0.97 (0.80, 1.18)                                             | 0.76            | 0.96 (0.84, 1.09)                                                 | 0.50            | 0.91 (0.77, 1.08)                                                    | 0.29            |
| BBOEP – Low                                          | 0.01 (-0.06, 0.08)                           | 0.80            | 1.06 (0.88, 1.29)                                             | 0.53            | 0.90 (0.75, 1.09)                                                 | 0.28            | 1.03 (0.87, 1.21)                                                    | 0.76            |
| BBOEP – High                                         | -0.06 (-0.12, 0.01)                          | 0.12            | 1.23 (1.06, 1.42)                                             | 0.01            | 0.91 (0.78, 1.06)                                                 | 0.20            | 1.04 (0.81, 1.33)                                                    | 0.75            |
| BCPP – Low                                           | 0.08 (-0.01, 0.17)                           | 0.07            | 0.84 (0.67, 1.05)                                             | 0.13            | 1.05 (0.92, 1.18)                                                 | 0.47            | 1.19 (1.01, 1.39)                                                    | 0.04            |
| BCPP – High                                          | -0.01 (-0.10, 0.09)                          | 0.92            | 0.96 (0.74, 1.25)                                             | 0.76            | 1.19 (1.04, 1.36)                                                 | 0.01            | 1.08 (0.93, 1.25)                                                    | 0.30            |
| Detect (compared with nondetect)                     |                                              |                 |                                                               |                 |                                                                   |                 |                                                                      |                 |
| BMPP                                                 | -0.03 (-0.11, 0.05)                          | 0.53            | 1.01 (0.87, 1.17)                                             | 0.88            | 1.03 (0.90, 1.18)                                                 | 0.64            | 0.99 (0.83, 1.18)                                                    | 0.89            |
| BEHP                                                 | -0.06 (-0.16, 0.04)                          | 0.22            | 0.95 (0.79, 1.15)                                             | 0.62            | 1.04 (0.92, 1.18)                                                 | 0.51            | 0.83 (0.71, 0.97)                                                    | 0.02            |
| DPRP                                                 | 0.09 (-0.01, 0.20)                           | 0.08            | 0.89 (0.69, 1.15)                                             | 0.36            | 1.03 (0.93, 1.14)                                                 | 0.60            | 1.18 (0.98, 1.42)                                                    | 0.09            |

Note: Regression models were adjusted for maternal race/ethnicity, maternal age at delivery, maternal education, maternal marital status, maternal pre-pregnancy BMI, maternal smoking during pregnancy, parity, child's sex, and sample collection season and year. BBOEP, bis(butoxyethyl) phosphate; BCETP, bis(2-chloroethyl) phosphate; BCPP, bis(1-chloro-2-propyl) phosphate; BDCPP, bis(1,3-dichloro-2-propyl) phosphate; BEHP, bis(2-ethylhexyl) phosphate; BMPP, bis(2-methylphenyl) phosphate; BW-GA, birth weight-for-gestational-age; CI, confidence interval; DBUP/DIBP, composite of dibutyl phosphate and di-isobutyl phosphate; DPHP, diphenyl phosphate; DPRP, dipropyl phosphate; ECHO, Environmental influences on Child Health Outcomes; LBW, low birth weight; OPE, organophosphate ester; OR, odds ratio.

**Table S10.** Associations between prenatal maternal urinary OPE biomarkers and fetal growth in the ECHO cohorts when jointly modelling all OPE biomarkers in the same regression model.

| OPE biomarkers                                       | BW-GA z-score ( <i>n</i> =6646) |                 | Term LBW [ <i>n</i> =150]<br>(vs. term non-LBW<br>[ <i>n</i> =6047]) <sup>a</sup> |                 | SGA [ <i>n</i> =419]<br>(vs. non-SGA [ <i>n</i> =6227]) |                 | LGA [ <i>n</i> =1066]<br>(vs. non-LGA [ <i>n</i> =5580]) |                 |
|------------------------------------------------------|---------------------------------|-----------------|-----------------------------------------------------------------------------------|-----------------|---------------------------------------------------------|-----------------|----------------------------------------------------------|-----------------|
|                                                      | β (95% CI)                      | <i>p</i> -value | OR (95% CI)                                                                       | <i>p</i> -value | OR (95% CI)                                             | <i>p</i> -value | OR (95% CI)                                              | <i>p</i> -value |
| Continuous (log2-transformed, dilution-standardized) |                                 |                 |                                                                                   |                 |                                                         |                 |                                                          |                 |
| DPHP                                                 | -0.02 (-0.04, 0.01)             | 0.13            | 1.06 (0.98, 1.15)                                                                 | 0.14            | 1.05 (1.00, 1.10)                                       | 0.04            | 0.97 (0.92, 1.03)                                        | 0.32            |
| DBUP/DIBP                                            | -0.01 (-0.03, 0.01)             | 0.38            | 0.89 (0.78, 1.02)                                                                 | 0.10            | 1.00 (0.94, 1.07)                                       | 0.99            | 0.98 (0.94, 1.02)                                        | 0.39            |
| BDCPP                                                | 0.00 (-0.01, 0.01)              | 0.45            | 0.98 (0.96, 1.01)                                                                 | 0.15            | 0.99 (0.97, 1.01)                                       | 0.17            | 0.98 (0.96, 1.00)                                        | 0.12            |
| High/Low (compared with nondetect)                   |                                 |                 |                                                                                   |                 |                                                         |                 |                                                          |                 |
| BCETP – Low                                          | 0.02 (-0.06, 0.10)              | 0.61            | 1.07 (0.64, 1.79)                                                                 | 0.81            | 0.96 (0.74, 1.25)                                       | 0.65            | 1.11 (0.93, 1.33)                                        | 0.23            |
| BCETP – High                                         | 0.03 (-0.01, 0.07)              | 0.16            | 0.98 (0.62, 1.56)                                                                 | 0.93            | 0.84 (0.71, 0.99)                                       | 0.04            | 1.05 (0.94, 1.17)                                        | 0.42            |
| BBOEP – Low                                          | 0.00 (-0.04, 0.05)              | 0.88            | 0.96 (0.70, 1.33)                                                                 | 0.82            | 0.90 (0.75, 1.08)                                       | 0.24            | 0.99 (0.89, 1.10)                                        | 0.83            |
| BBOEP – High                                         | -0.02 (-0.10, 0.05)             | 0.57            | 1.07 (0.75, 1.52)                                                                 | 0.71            | 1.05 (0.92, 1.21)                                       | 0.44            | 0.99 (0.85, 1.15)                                        | 0.85            |
| BCPP – Low                                           | 0.06 (0.00, 0.12)               | 0.05            | 0.76 (0.56, 1.02)                                                                 | 0.07            | 0.82 (0.62, 1.08)                                       | 0.16            | 1.05 (0.89, 1.22)                                        | 0.59            |
| BCPP – High                                          | 0.06 (-0.02, 0.14)              | 0.13            | 0.52 (0.31, 0.88)                                                                 | 0.02            | 0.88 (0.65, 1.19)                                       | 0.40            | 1.03 (0.85, 1.24)                                        | 0.77            |
| Detect (compared with nondetect)                     |                                 |                 |                                                                                   |                 |                                                         |                 |                                                          |                 |
| BMPP                                                 | 0.06 (0.01, 0.10)               | 0.02            | 1.08 (0.68, 1.70)                                                                 | 0.75            | 0.87 (0.70, 1.09)                                       | 0.24            | 1.09 (0.94, 1.26)                                        | 0.27            |
| BEHP                                                 | -0.01 (-0.07, 0.05)             | 0.69            | 1.26 (0.96, 1.67)                                                                 | 0.10            | 1.04 (0.87, 1.25)                                       | 0.67            | 0.98 (0.82, 1.17)                                        | 0.80            |
| DPRP                                                 | 0.03 (0.00, 0.06)               | 0.06            | 0.72 (0.54, 0.97)                                                                 | 0.03            | 0.90 (0.75, 1.08)                                       | 0.24            | 1.07 (0.92, 1.25)                                        | 0.37            |

Note: Regression models were adjusted for maternal race/ethnicity, maternal age at delivery, maternal education, maternal marital status, maternal pre-pregnancy BMI, maternal smoking during pregnancy, parity, child's sex, and sample collection season and year. BBOEP, bis(butoxyethyl) phosphate; BCETP, bis(2-chloroethyl) phosphate; BCPP, bis(1-chloro-2-propyl) phosphate; BDCPP, bis(1,3-dichloro-2-propyl) phosphate; BEHP, bis(2-ethylhexyl) phosphate; BMPP, bis(2-methylphenyl) phosphate; BW-GA, birth weight-for-gestational-age; CI, confidence interval; DBUP/DIBP, composite of dibutyl phosphate and di-isobutyl phosphate; DPHP, diphenyl phosphate; DPRP, dipropyl phosphate; ECHO, Environmental influences on Child Health Outcomes; LBW, low birth weight; OPE, organophosphate ester; OR, odds ratio.

<sup>a</sup>LBW vs. non-LBW among 6197 non-preterm birth (≥37 weeks gestation).

**Table S11.** Median concentrations of prenatal maternal urinary OPE biomarkers across birth cohort studies.

| Country/<br>recruitment<br>or sampling<br>year | Study<br>population ( <i>n</i> )                                       | Median concentrations (ng/mL)              |                                        |                                            |                                            |       |       | GA at sample<br>collection                    | Reference                             |
|------------------------------------------------|------------------------------------------------------------------------|--------------------------------------------|----------------------------------------|--------------------------------------------|--------------------------------------------|-------|-------|-----------------------------------------------|---------------------------------------|
|                                                |                                                                        | DPHP                                       | DBUP/<br>DIBP                          | BDCPP                                      | BCETP                                      | BBOEP | BCPP  |                                               |                                       |
| U.S. / 2007-<br>2020                           | ECHO<br>( <i>n</i> =6646)                                              | 0.92                                       | 0.19                                   | 0.86                                       | 0.52                                       | 0.05  | 0.12  | 1 <sup>st</sup> -3 <sup>rd</sup><br>trimester | This study                            |
| U.S. (CA) /<br>1999-2000                       | CHAMACOS<br>( <i>n</i> =310)                                           | 0.93                                       |                                        | 0.41                                       |                                            |       |       | 26 weeks                                      | Castorina et<br>al. 2017 <sup>1</sup> |
| U.S. (NC) /<br>2001-2006                       | PIN ( <i>n</i> =349)                                                   | 1.31                                       |                                        | 1.85                                       |                                            |       | <0.33 | 24-30 weeks                                   | Hoffman et<br>al. 2018 <sup>2</sup>   |
| U.S. (OH) /<br>2003-2006                       | HOME<br>( <i>n</i> =357)                                               | 1.43 (16w),<br>1.36 (26w),<br>2.16 (birth) | 0.24 (16w,<br>26w, birth) <sup>a</sup> | 0.70 (16w),<br>0.70 (26w),<br>0.83 (birth) | 0.63 (16w),<br>0.75 (26w),<br>0.83 (birth) |       |       | 16 and 26<br>weeks, at<br>delivery            | Percy et al.<br>2020 <sup>3</sup>     |
| U.S. (MA) /<br>2010-2017                       | LIFECODES<br>( <i>n</i> =90)                                           | 0.74                                       |                                        | 0.67                                       |                                            |       |       | 11, 26, 35<br>weeks                           | Bommarito et<br>al. 2021 <sup>4</sup> |
| U.S. (PR) /<br>2011-2015                       | PROTECT<br>( <i>n</i> =148)                                            | 1.55                                       |                                        | 1.41                                       | 0.84                                       |       | 0.26  | 20, 28 weeks                                  | Ingle et al.<br>2019 <sup>5</sup>     |
| U.S. (RI) /<br>2014                            | Women and<br>Infants<br>Hospital of<br>Rhode Island<br>( <i>n</i> =58) | 0.89 (12w),<br>1.10 (28w),<br>1.11 (35w)   |                                        | 0.94 (12w),<br>1.16 (28w),<br>1.55 (35w)   | 0.28 (12w),<br>0.25 (28w),<br>0.38 (35w)   |       |       | 12, 28, 35<br>weeks                           | Romano et<br>al. 2017 <sup>6</sup>    |

|                                 |                                                                              |                                          |       |                                          |                                          |       |                     |                                    |
|---------------------------------|------------------------------------------------------------------------------|------------------------------------------|-------|------------------------------------------|------------------------------------------|-------|---------------------|------------------------------------|
| U.S. (MD) /<br>2017-2019        | ORCHARD<br>( <i>n</i> =90)                                                   | 0.71 (15w),<br>1.00 (22w),<br>1.12 (31w) |       | 0.61 (15w),<br>0.83 (22w),<br>0.51 (31w) |                                          | <0.01 | 15, 22, 31<br>weeks | Kuiper et al.<br>2020 <sup>7</sup> |
| China<br>(Wuhan) /<br>2014-2016 | Wuhan<br>Maternal and<br>Child<br>Healthcare<br>Hospital<br>( <i>n</i> =213) | 0.23 (13w),<br>0.24 (24w),<br>0.23 (34w) | <0.25 | 0.08 (13w),<br>0.10 (24w),<br>0.10 (34w) | 0.15 (13w),<br>0.15 (24w),<br>0.12 (34w) |       | 13, 24, 34<br>weeks | Luo et al.<br>2021 <sup>8</sup>    |

Note: OPE biomarkers that were only quantified in this study (i.e., DBUP/DIBP, BMPP, BEHP, DPRP) were excluded from the table. Studies with a sample size >30 are summarized. Except Percy et al. that used creatinine-corrected urinary concentrations,<sup>3</sup> all studies used specific gravity-corrected urinary concentrations. BBOEP, bis(butoxyethyl) phosphate; BCETP, bis(2-chloroethyl) phosphate; BCPP, bis(1-chloro-2-propyl) phosphate; BDCPP, bis(1,3-dichloro-2-propyl) phosphate; BEHP, bis(2-ethylhexyl) phosphate; BMPP, bis(2-methylphenyl) phosphate; DBUP/DIBP, composite of dibutyl phosphate and di-isobutyl phosphate; DPHP, diphenyl phosphate; DPRP, dipropyl phosphate; GA: gestational age; OPE, organophosphate ester.  
<sup>a</sup>Percy et al. quantified di-*n*-butyl phosphate,<sup>3</sup> and Luo et al. quantified dibutyl phosphate.<sup>8</sup>

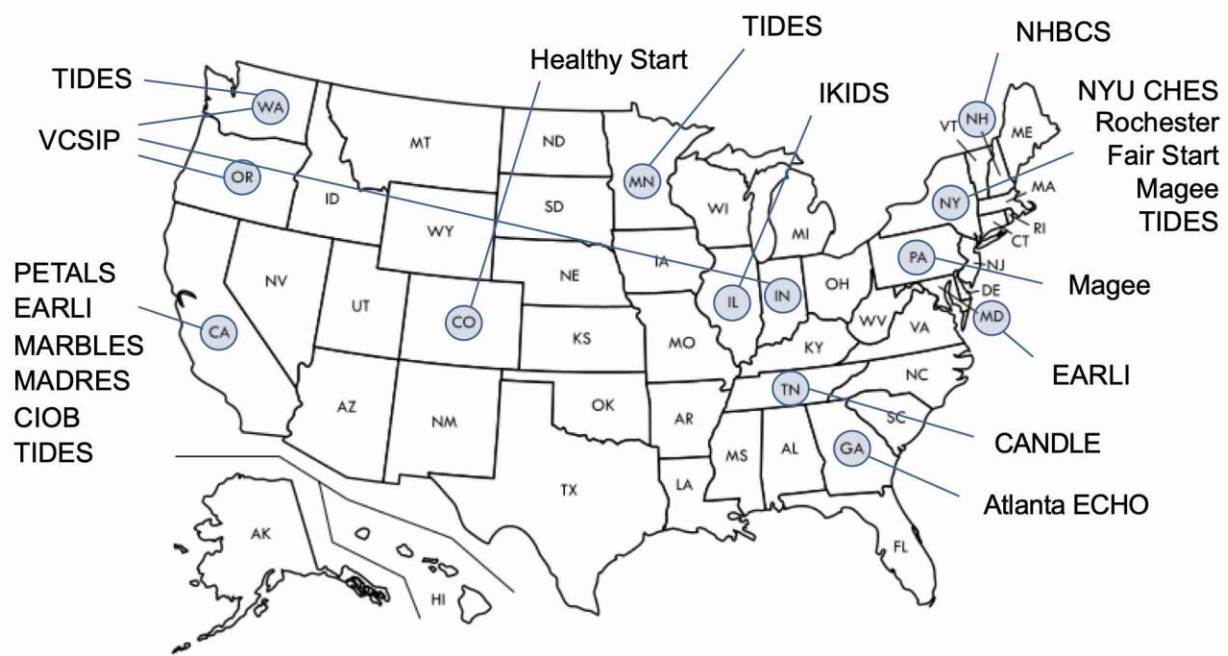

**Figure S1.** Geographic locations of 16 cohorts contributing to the ECHO study on organophosphate ester flame retardant exposures during pregnancy and gestational duration and fetal growth. Cohort names and participant numbers are provided in Table S1. ECHO, Environmental influences on Child Health Outcomes.

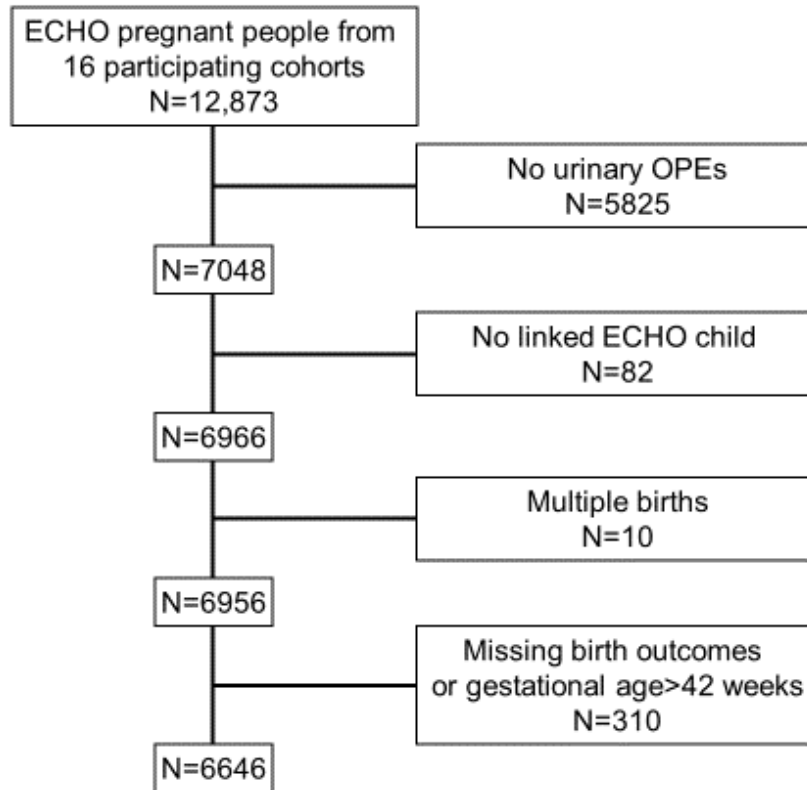

**Figure S2.** Flowchart depicting inclusion/exclusion criteria. ECHO, Environmental influences on Child Health Outcomes; OPE, organophosphate ester.

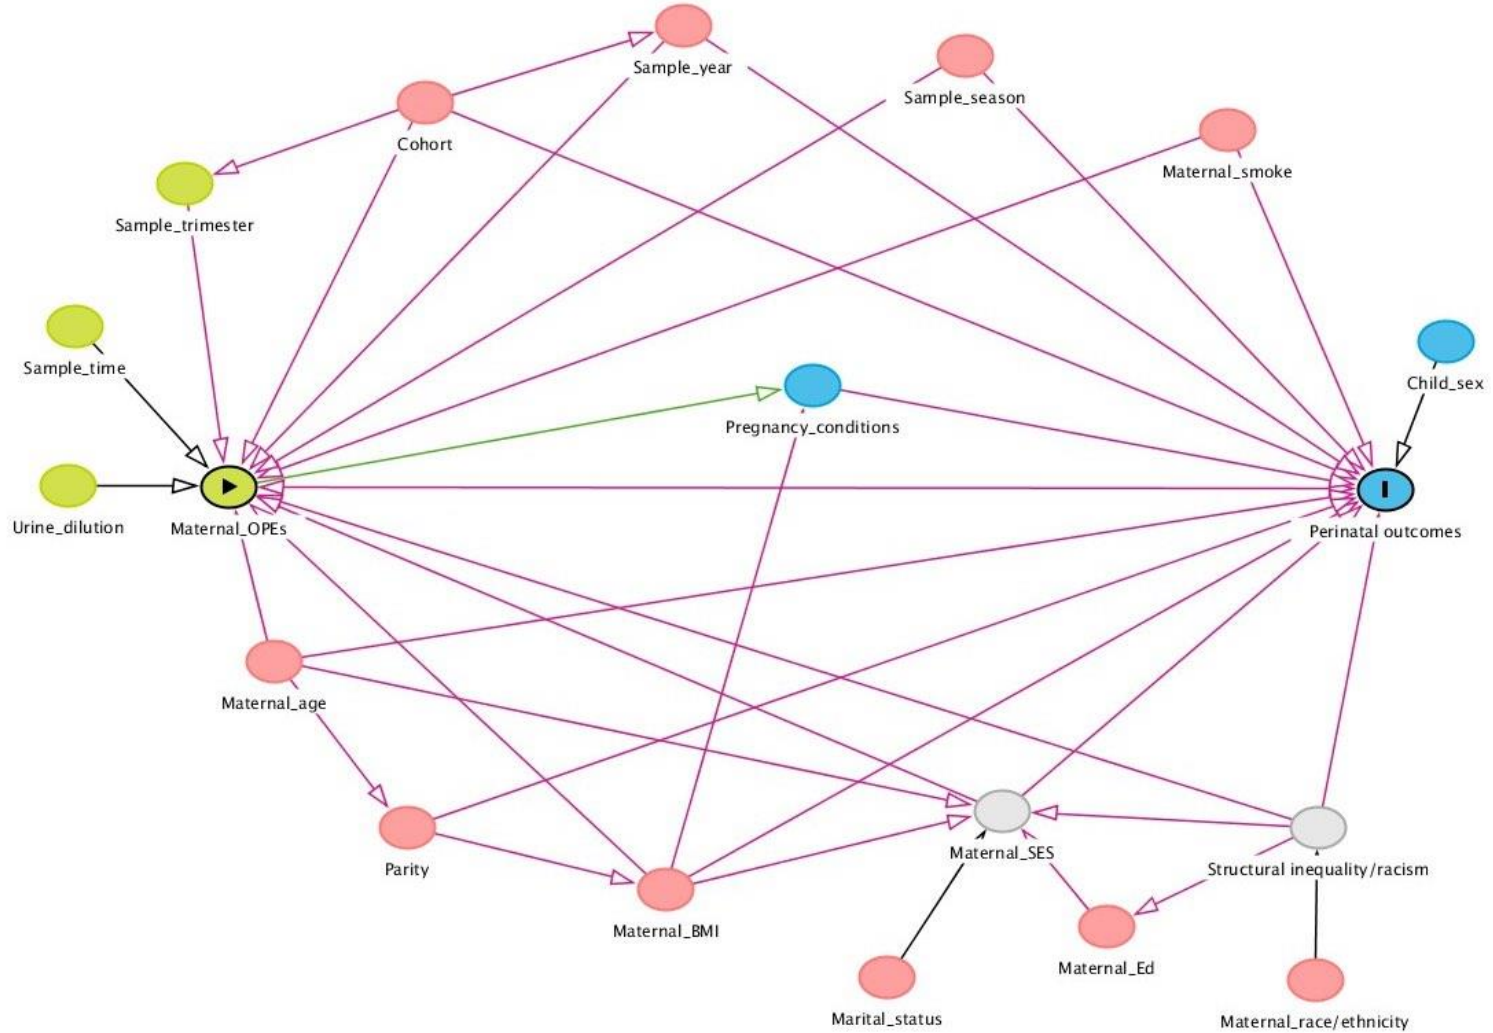

**Figure S3.** Directed acyclic graph for the relation between maternal OPE exposures during pregnancy and birth outcomes. Green circles represent the exposure or predictors of the exposure, blue circles represent the outcome or predictors of the outcome, pink circles represent predictors of both exposure and outcome, and grey circles are unobserved confounders. BMI, body mass index; Ed, education; OPE, organophosphate ester; SES, socio-economic status.



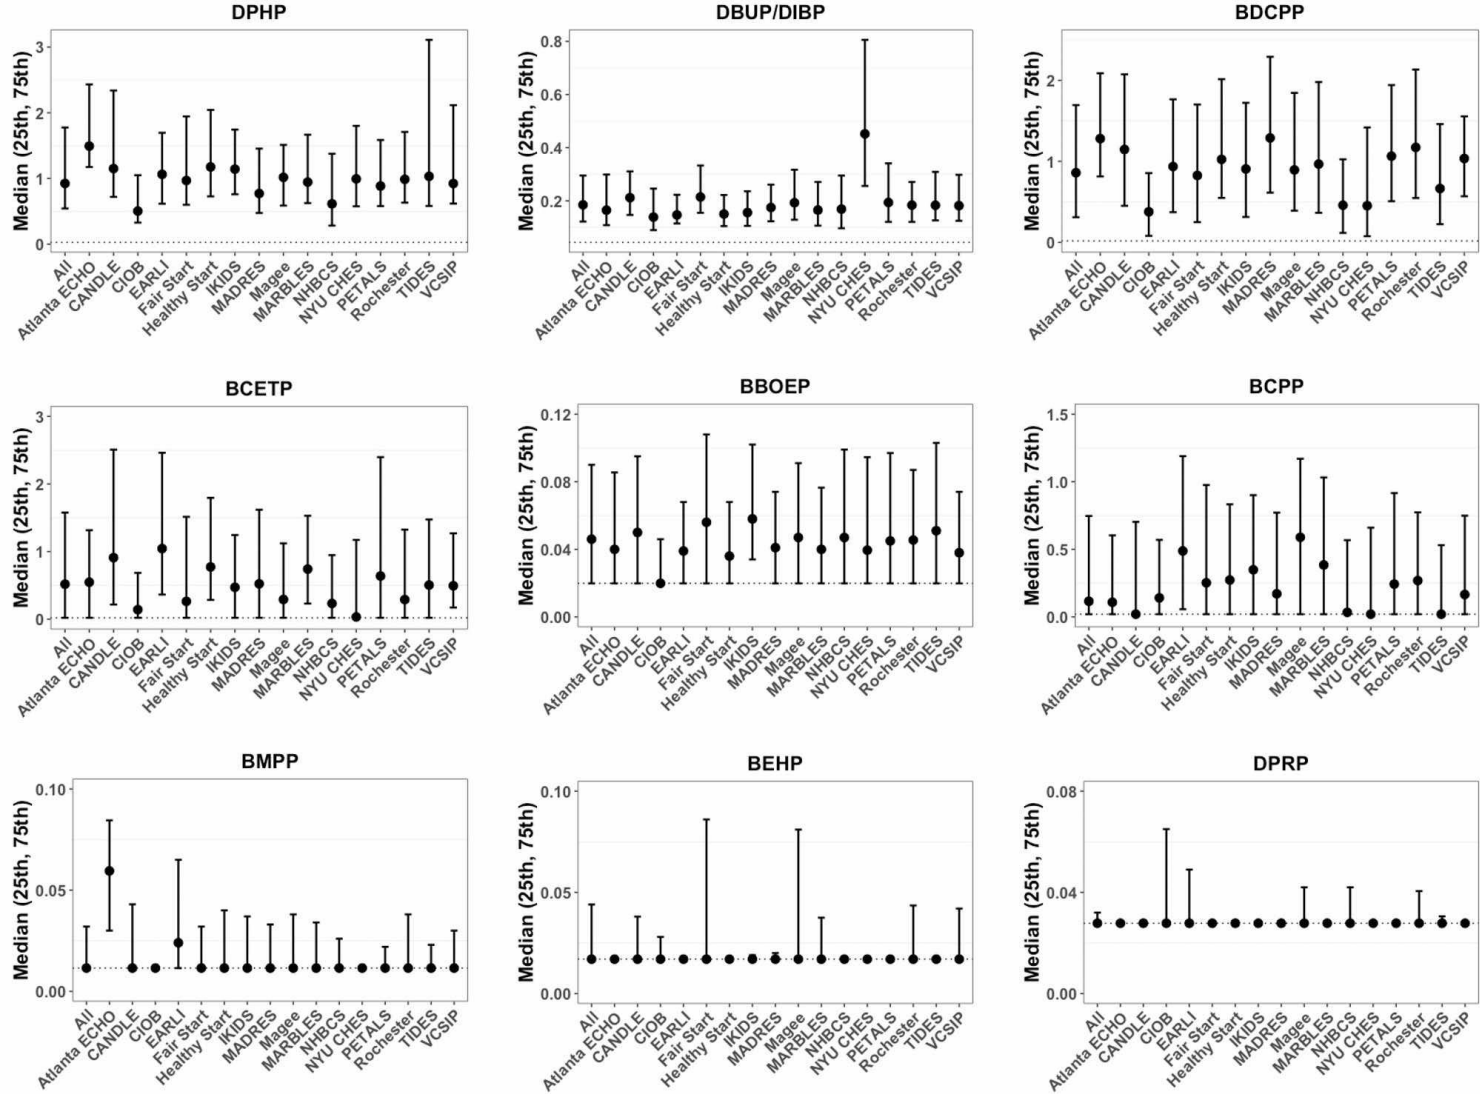

**Figure S4.** Graphical representation of distributions of dilution-standardized urinary OPE biomarker concentrations by ECHO cohort. Dotted lines indicate the limit of detection (LOD). Concentrations <LOD were replaced with LOD values of each OPE biomarker for

graphical representation. LOD values were 0.04 ng/mL for DBUP/DIBP, 0.03 ng/mL for DPHP and DPRP, 0.02 ng/mL for BDCPP, BCETP, BBOEP, BCPP, and BEHP, and 0.01 ng/mL for BMPP. Numeric data are presented in Table S4, and cohort names and participant numbers can be found in Table S1. BBOEP, bis(butoxyethyl) phosphate; BCETP, bis(2-chloroethyl) phosphate; BCPP, bis(1-chloro-2-propyl) phosphate; BDCPP, bis(1,3-dichloro-2-propyl) phosphate; BEHP, bis(2-ethylhexyl) phosphate; BMPP, bis(2-methylphenyl) phosphate; DBUP/DIBP, composite of dibutyl phosphate and di-isobutyl phosphate; DPHP, diphenyl phosphate; DPRP, dipropyl phosphate; OPE, organophosphate ester.

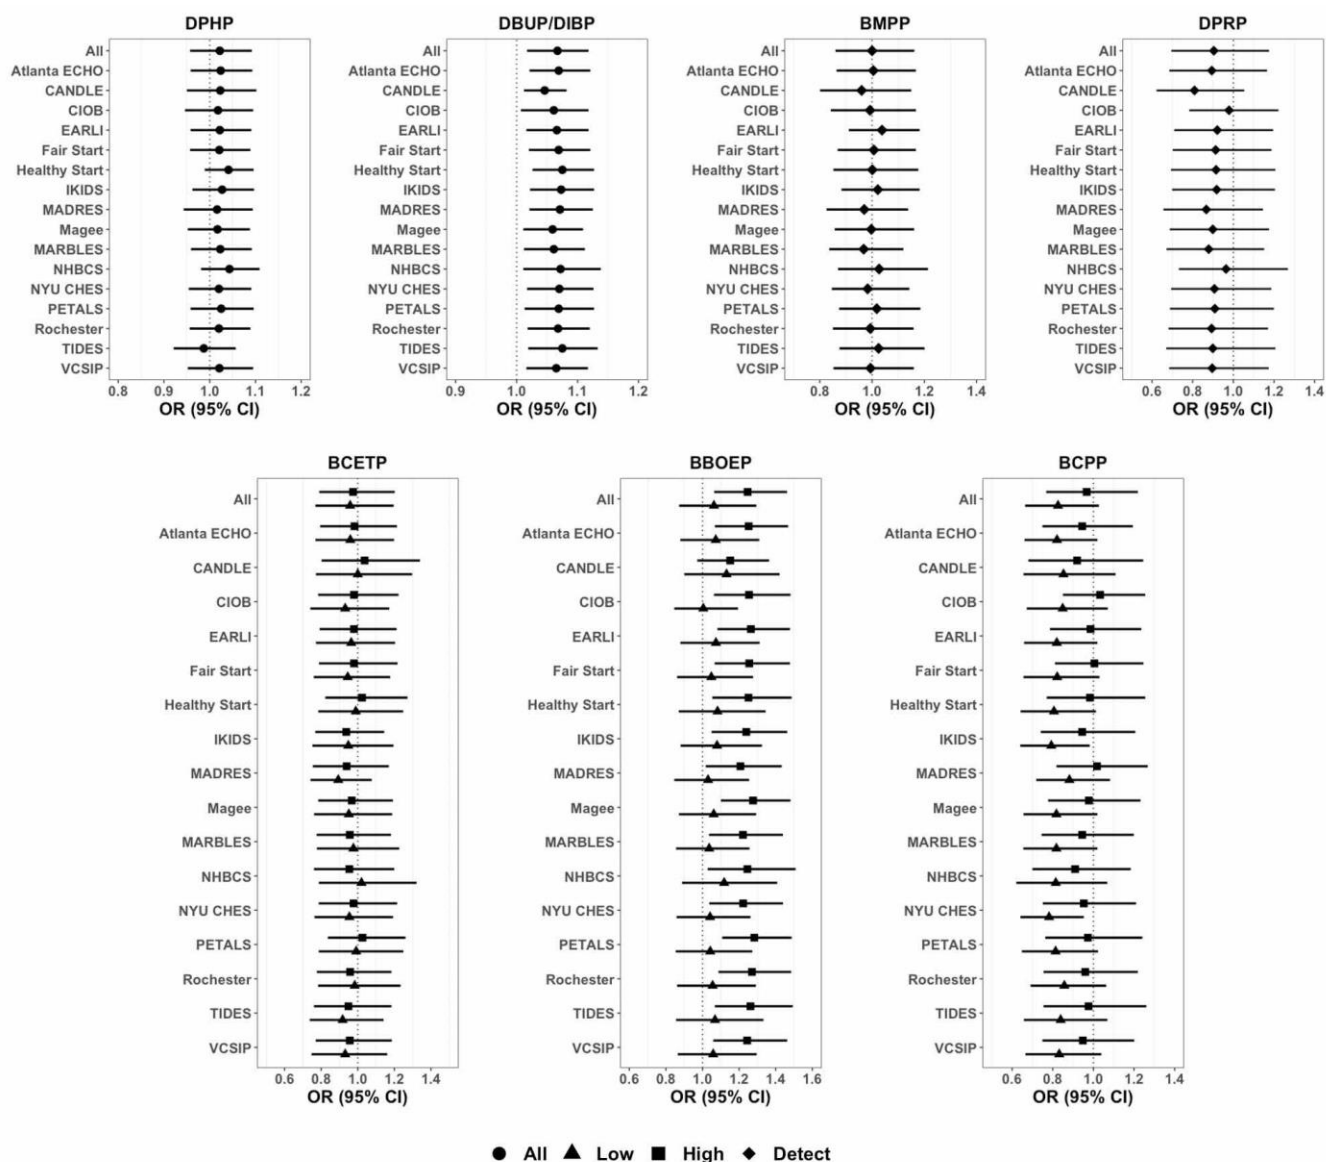

**Figure S5.** Graphical representation of leave-one-out analysis results for preterm birth (vs. full-term) in the ECHO cohorts. Point estimates indicate regression coefficients or odds ratios, and error bars indicate 95% confidence intervals. For categorized OPE biomarkers (i.e., BCETP, BBOEP, BCPP), estimates of low/high category were computed compared with the nondetect. Regression models were adjusted for maternal race/ethnicity, maternal age at delivery, maternal education, maternal marital status, maternal pre-pregnancy BMI, maternal smoking during pregnancy, parity, child's sex, and sample collection season and year. Numeric data are presented in Table S11, and cohort names and participant numbers can be found in Table S1. BBOEP, bis(butoxyethyl) phosphate; BCETP, bis(2-chloroethyl) phosphate; BCPP, bis(1-chloro-2-propyl) phosphate; BDCPP, bis(1,3-dichloro-2-propyl) phosphate; BEHP, bis(2-ethylhexyl) phosphate; BMI, body mass index; BMPP, bis(2-methylphenyl) phosphate; DBUP/DIBP, composite of dibutyl phosphate and di-isobutyl phosphate; DPHP, diphenyl phosphate; DPRP, dipropyl phosphate; OPE, organophosphate ester.

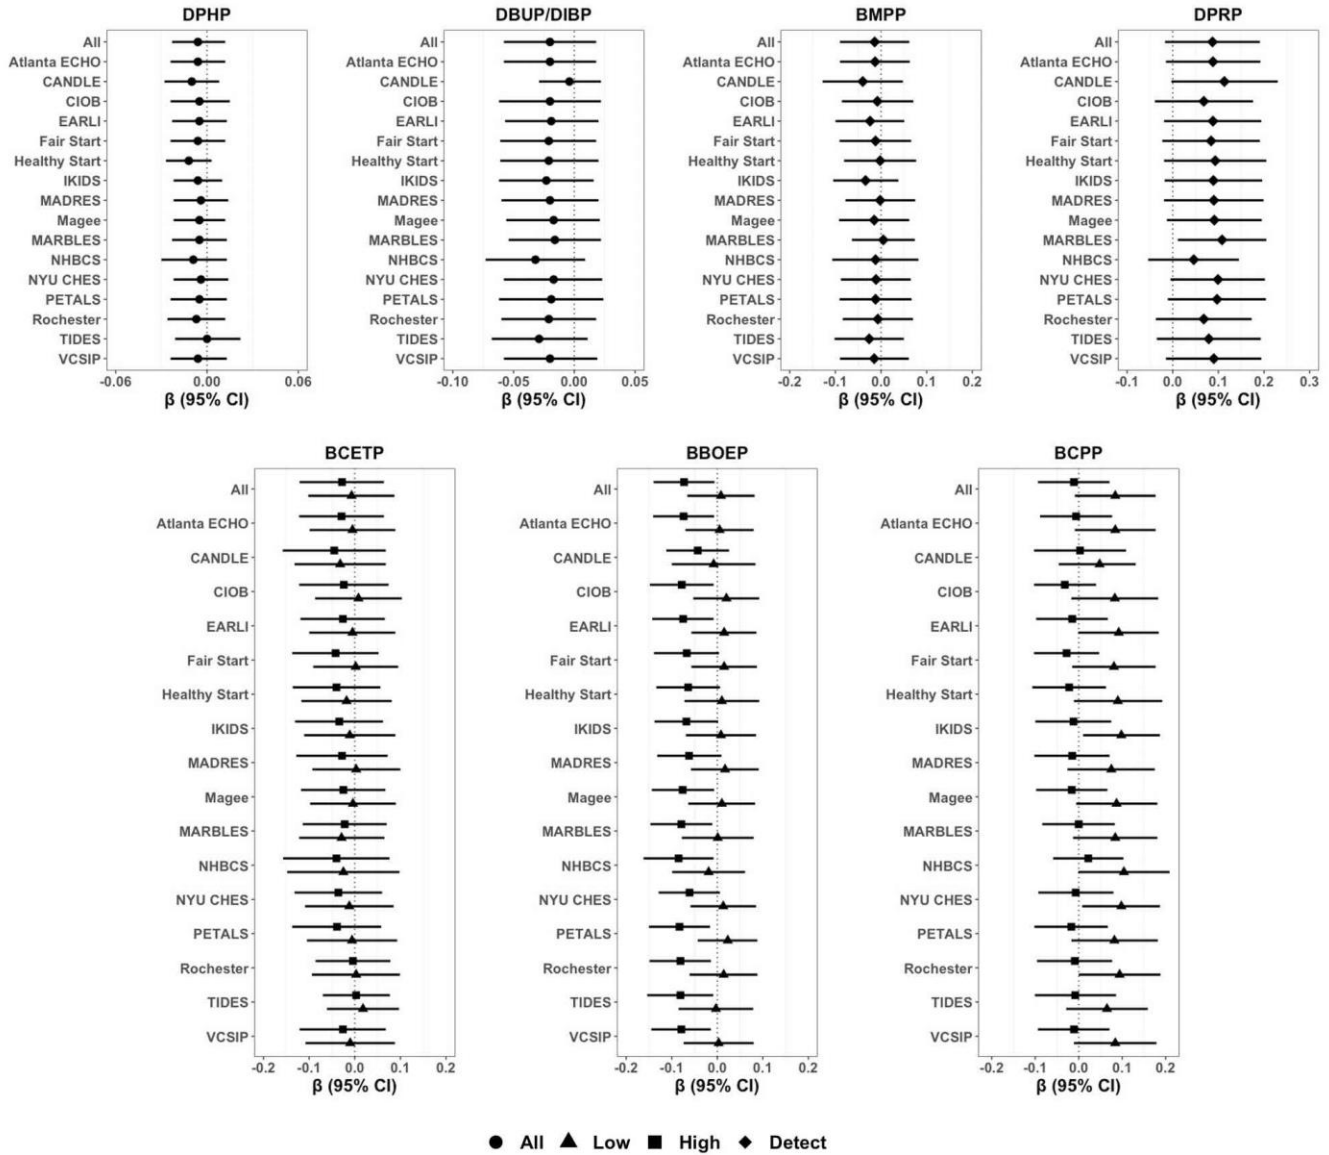

**Figure S6.** Graphical representation of leave-one-out analysis results for gestational age (weeks) in the ECHO cohorts. Point estimates indicate regression coefficients or odds ratios, and error bars indicate 95% confidence intervals. For categorized OPE biomarkers (i.e., BCETP, BBOEP, BCPP), estimates of low/high category were computed compared with the nondetect. Regression models were adjusted for maternal race/ethnicity, maternal age at delivery, maternal education, maternal marital status, maternal pre-pregnancy BMI, maternal smoking during pregnancy, parity, child's sex, and sample collection season and year. Numeric data are presented in Table S12, and cohort names and participant numbers can be found in Table S1. BBOEP, bis(butoxyethyl) phosphate; BCETP, bis(2-chloroethyl) phosphate; BCPP, bis(1-chloro-2-propyl) phosphate; BDCPP, bis(1,3-dichloro-2-propyl) phosphate; BEHP, bis(2-ethylhexyl) phosphate; BMI, body mass index; BMPP, bis(2-methylphenyl) phosphate; DBUP/DIBP, composite of dibutyl phosphate and di-isobutyl phosphate; DPHP, diphenyl phosphate; DPRP, dipropyl phosphate; OPE, organophosphate ester.

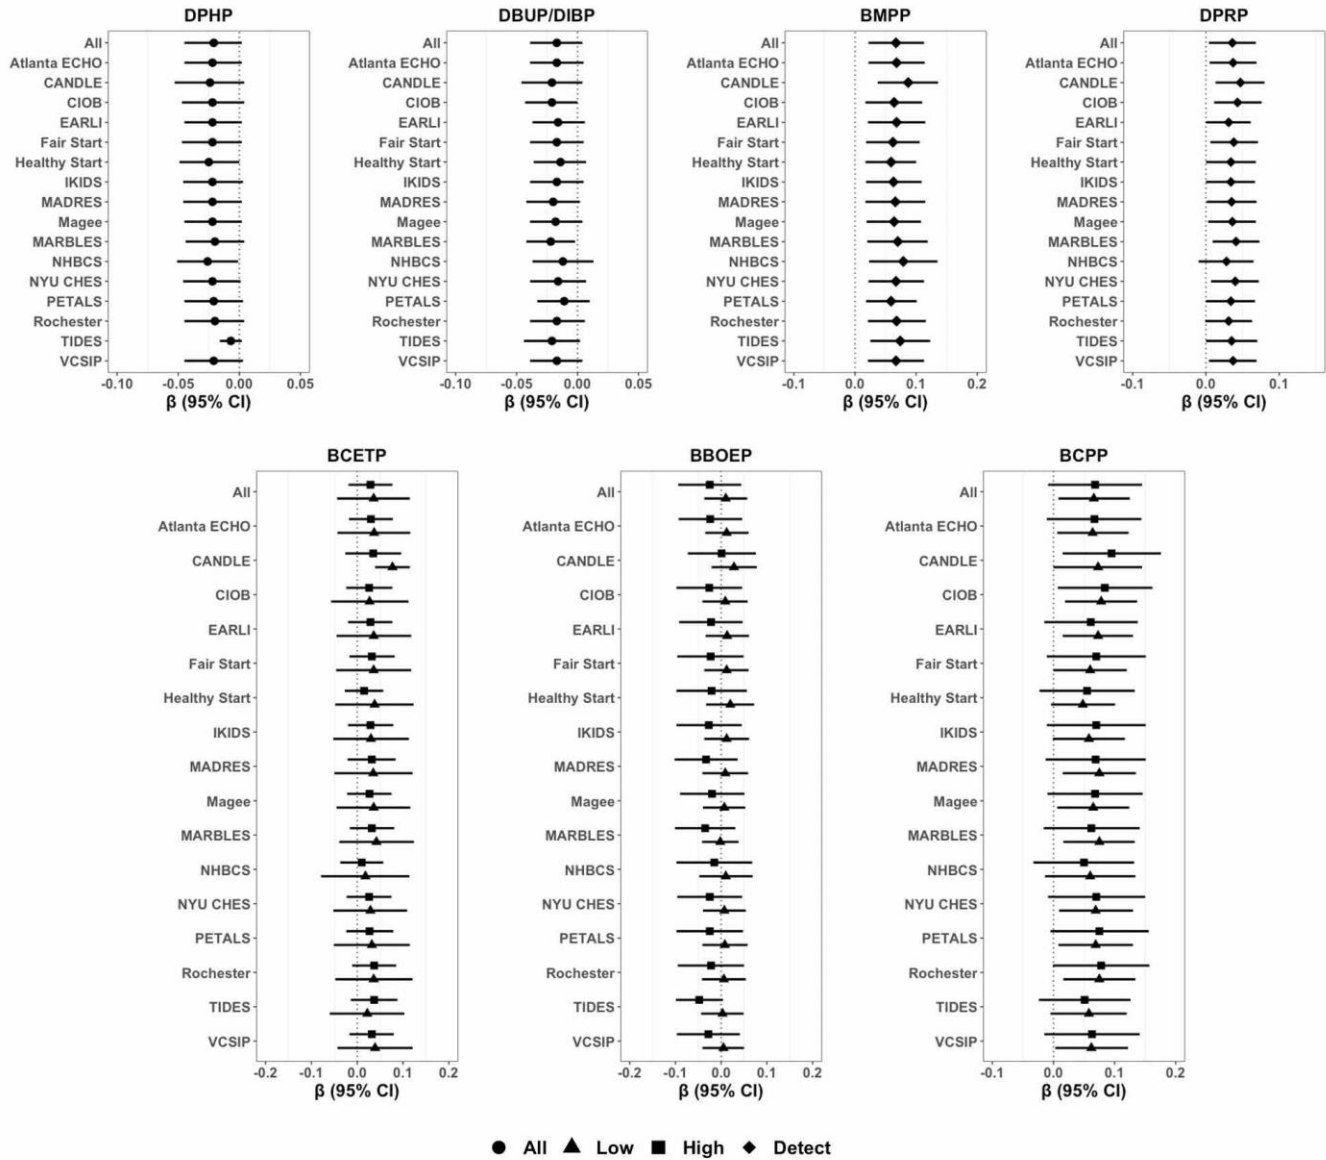

**Figure S7.** Graphical representation of leave-one-out analysis results for birth weight-for-gestational-age z-score in the ECHO cohorts. Point estimates indicate regression coefficients or odds ratios, and error bars indicate 95% confidence intervals. For categorized OPE biomarkers (i.e., BCETP, BBOEP, BCPP), estimates of low/high category were computed compared with the nondetect. Regression models were adjusted for maternal race/ethnicity, maternal age at delivery, maternal education, maternal marital status, maternal pre-pregnancy BMI, maternal smoking during pregnancy, parity, child's sex, and sample collection season and year. Numeric data are presented in Table S13, and cohort names and participant numbers can be found in Table S1. BBOEP, bis(butoxyethyl) phosphate; BCETP, bis(2-chloroethyl) phosphate; BCPP, bis(1-chloro-2-propyl) phosphate; BDCPP, bis(1,3-dichloro-2-propyl) phosphate; BEHP, bis(2-ethylhexyl) phosphate; BMI, body mass index; BMPP, bis(2-methylphenyl) phosphate; DBUP/DIBP, composite of dibutyl phosphate and di-isobutyl phosphate; DPHP, diphenyl phosphate; DPRP, dipropyl phosphate; OPE, organophosphate ester.

## REFERENCES

1. Castorina R, Butt C, Stapleton HM, et al. Flame retardants and their metabolites in the homes and urine of pregnant women residing in California (the CHAMACOS cohort). *Chemosphere*. 2017;179:159-166.
2. Hoffman K, Stapleton HM, Lorenzo A, et al. Prenatal exposure to organophosphates and associations with birthweight and gestational length. *Environment international*. 2018;116:248-254.
3. Percy Z, Vuong AM, Ospina M, et al. Organophosphate esters in a cohort of pregnant women: variability and predictors of exposure. *Environmental research*. 2020;184:109255.
4. Bommarito PA, Welch BM, Keil AP, et al. Prenatal exposure to consumer product chemical mixtures and size for gestational age at delivery. *Environmental Health*. 2021;20(1):1-13.
5. Ingle ME, Watkins D, Rosario Z, et al. The association of urinary organophosphate ester metabolites and self-reported personal care and household product use among pregnant women in Puerto Rico. *Environmental research*. 2019;179:108756.
6. Romano ME, Hawley NL, Eliot M, et al. Variability and predictors of urinary concentrations of organophosphate flame retardant metabolites among pregnant women in Rhode Island. *Environmental Health*. 2017;16(1):1-11.
7. Kuiper JR, Stapleton HM, Wills-Karp M, Wang X, Burd I, Buckley JP. Predictors and reproducibility of urinary organophosphate ester metabolite concentrations during pregnancy and associations with birth outcomes in an urban population. *Environmental Health*. 2020;19(1):1-15.
8. Luo D, Liu W, Wu W, et al. Trimester-specific effects of maternal exposure to organophosphate flame retardants on offspring size at birth: A prospective cohort study in China. *Journal of Hazardous Materials*. 2021;406:124754.
