# Supplementary material
Source: PubMed Central journal article supplement (PMC10805613)
Supplement: ehp13182.smcontents.508.pdf [file ehp13182.smcontents.508.pdf]

**Note to readers with disabilities:** *EHP* strives to ensure that all journal content is accessible to all readers. However, some figures and Supplemental Material published in *EHP* articles may not conform to [508 standards](#) due to the complexity of the information being presented. If you need assistance accessing journal content, please contact [ehp508@niehs.nih.gov](mailto:ehp508@niehs.nih.gov). Our staff will work with you to assess and meet your accessibility needs within 3 working days.

### **Supplemental Material**

#### **Associations of Organophosphate Ester Flame Retardant Exposures during Pregnancy with Gestational Duration and Fetal Growth: The Environmental influences on Child Health Outcomes (ECHO) Program**

Jiwon Oh, Jessie P. Buckley, Xuan Li, Kennedy K. Gachigi, Kurunthachalam Kannan, Wenjie Lyu, Jennifer L. Ames, Emily S. Barrett, Theresa M. Bastain, Carrie V. Breton, Claudia Buss, Lisa A. Croen, Anne L. Dunlop, Assiamira Ferrara, Akhgar Ghassabian, Julie B. Herbstman, Ixel Hernandez-Castro, Irva Hertz-Picciotto, Linda G. Kahn, Margaret R. Karagas, Jordan R. Kuiper, Cindy T. McEvoy, John D. Meeker, Rachel Morello-Frosch, Amy M. Padula, Megan E. Romano, Sheela Sathyanarayana, Susan Schantz, Rebecca J. Schmidt, Hyagriv Simhan, Anne P. Starling, Frances A. Tylavsky, Heather E. Volk, Tracey J. Woodruff, Yeyi Zhu, Deborah H. Bennett, and program collaborators for Environmental influences on Child Health Outcomes

#### **Table of Contents**

**Table S1.** Information on 16 ECHO cohorts contributing to this study.

**Table S2.** Information on nine OPE biomarkers quantified in prenatal maternal serum samples in the ECHO cohorts.

**Table S3.** Demographic characteristics of participants from 16 ECHO cohorts by study sample inclusion status.

**Table S4.** Distributions of urinary dilution-standardized OPE biomarker concentrations by ECHO cohort.

**Table S5.** Spearman's correlation coefficients among urinary dilution-standardized OPE biomarker concentrations among 6646 ECHO pregnant participants.

**Table S6.** Analysis results of urinary OPE biomarker concentrations in 191 blinded duplicate samples.

**Table S7.** Sex-stratified associations between prenatal maternal urinary OPE biomarkers and gestational duration in the ECHO cohorts and *p*-value for the interaction term between child's sex and OPE biomarkers to test for effect measure modification.

**Table S8.** Sex-stratified associations between prenatal maternal urinary OPE biomarkers and fetal growth in the ECHO cohorts and *p*-value for the interaction term between child's sex and OPE biomarkers to test for effect measure modification.

**Table S9.** Associations between prenatal maternal urinary OPE biomarkers and gestational duration in the ECHO cohorts when jointly modelling all OPE biomarkers in the same regression model.

**Table S10.** Associations between prenatal maternal urinary OPE biomarkers and fetal growth in the ECHO cohorts when jointly modelling all OPE biomarkers in the same regression model.

**Table S11.** Median concentrations of prenatal maternal urinary OPE biomarkers across birth cohort studies.

**Figure S1.** Geographic locations of 16 cohorts contributing to the ECHO study on organophosphate ester flame retardant exposures during pregnancy and gestational duration and fetal growth.

**Figure S2.** Flowchart depicting inclusion/exclusion criteria.

**Figure S3.** Directed acyclic graph for the relation between maternal OPE exposures during pregnancy and birth outcomes.

**Figure S4.** Graphical representation of distributions of dilution-standardized urinary OPE biomarker concentrations by ECHO cohort.

**Figure S5.** Graphical representation of leave-one-out analysis results for preterm birth (vs. full-term) in the ECHO cohorts.

**Figure S6.** Graphical representation of leave-one-out analysis results for gestational age (weeks) in the ECHO cohorts.

**Figure S7.** Graphical representation of leave-one-out analysis results for birth weight-for-gestational-age z-score in the ECHO cohorts.

## References

**Additional File-** Excel Document
